# Supplementary material
Source: publisher figshare collection journal article supplement (https://gsapubs.figshare.com/ndownloader/files/23313680)
Supplement: Supplementary file 1 [file 23313680]

## Sheet: Sheet 1 - Oceanic Origin of Con
Oceanic Origin of Continental Mantle Lithosphere: global compilation of mantle xenoliths.
Sample	Location	Source	Lat	Long	Ol	Opx	Gt	Cpx	Sp	Al2O3	CaO	Fe2O3	FeOtot	FeO	MgO	T(C)	P(GPa)	Mg#	Fo	Os/Os	Re/Os	Os/Os, corr	Trd(Ga)	Tma(Ga)	combined = Al2O3 bearing mineral + rock type	rock type	Al2O3 bearing mineral	Re/Os,Os/Os adopted by authors	Recomputed_Trd	Recomputed_Tma	New_Trd	New_Tma	Ages computed after Miesel, 2001 and Carlson, 2005, Os/Os = 0.1262, Re/Os = 0.3924
1007	Jagersfontein	Walker et al., 1989	-30	25.5	70.2	23.9	2.4	1.8	0.3	0.8						655	2.3	93.3		0.918	3.61		2.74		GP			Walker et al, 1989, 187Os/188Os = 0.12757
1008	Jagersfontein	Walker et al., 1989	-30	25.5	61.7	29.7	3.9	2.1	0.4	1.14						770	3	92.8		0.927	0.352		2.5	2.79	GP			In this sample Walker et al. use 187Os/188Os and 187Re/186Os
1012	Jagersfontein	Walker et al., 1989	-30	25.5	74	16.9	5.3	2.6	0	1.16						1295	6	90.8		1.038	4.92		0.55		GP
1033	Jagersfontein	Walker et al., 1989	-30	25.5	84.2	7.53	4.9	3.5	0	1.02						1270	6	91.2		0.966	1.03		1.79	2.54	GP
4254	N. Lesotho	Walker et al., 1989	-29	29	63.6	32.1	3.9	0	0.2	0.99						1070	4.8	93.7		0.976	12.5		1.89		GP
4258	N. Lesotho	Walker et al., 1989	-29	29	70.6	28.6	0	0	0.8	0.74								93.3		1.07	9.05		0.04	0.11	SP
1566	N. Lesotho	Walker et al., 1989	-29	29	83.6	8.5	5	3.5	0							1510	6.7	88.8		1.051	2.72		0.17	0.97	GH
1596	N. Lesotho	Walker et al., 1989	-29	29	80.8	13.6	3.4	2.5	0							1525	6.7	90.5		0.905	1.65		2.89	5.65	GH
1924	N. Lesotho	Walker et al., 1989	-29	29	74.2	8.6	6.5	10.7	0							1430	6.4	90.8		1.002	0.859		1.1	1.48	GL
1925	N. Lesotho	Walker et al., 1989	-29	29	70.7	12	6.6	11.9	0							1450	6.3	90.5		0.978	2.02		1.54	3.89	GL
5267	Premier	Walker et al., 1989	-26	29	63	20.2	7.7	7.7	0	1.8						1335	6.4	91.2		1.003	1.91		1.7	2.52	GP
5268	Premier	Walker et al., 1989	-26	29	73.4	21.7	3.5	0	0	0.86						1385	6.6	91.7		0.956	0.773		1.98	2.54	GP
FRB979	Jagersfontein	Pearson et al., 1995	-30	25.5															93.5	0.1182	0.796	0.117	1.6					Walker, 1989, 187Re/188Os = 433, 187Os/188Os = 0.12757	1.28505	-1.91529	1.39105	-1.20172
FRB1001	Jagersfontein	Pearson et al., 1995	-30	25.5															94.1	0.11339	0.156	0.1132	2.2	3.5					2.20605	3.41366	1.95633	3.1675
PHN2600	Liqhobong	Pearson et al., 1995	-28.62	28.62															95.5	0.10808	0.267	0.1077	3	8.5					2.91142	7.31679	2.76519	8.10119
PHN5266	Premier	Pearson et al., 1995	-26	29												637			92.7	0.11326	0.174	0.1099	2.7	3.8					2.22342	3.67219	2.44296	3.455
PHN5254	Premier	Pearson et al., 1995	-26	29												571			92.1	0.11588	0.083	0.1143	2	2.2					1.87241	2.30799	1.79324	1.96943
PHN5275	Premier	Pearson et al., 1995	-26	29															0	0.11166	0.06	0.1105	2.6	2.8					2.43677	2.81967	2.35477	2.5698
F556	Finsch	Pearson et al., 1995 Dante and O’Neill,1996	-28.5	23.5								0.16		9.21	40.7	1116	5.9	88.5792	91.1	0.11596	0.093	0.1158	1.8	2.3	GH				1.86166	2.36097	1.57013	2.0186
F865	Finsch	Pearson et al., 1995 Dante and O’Neill,1996	-28.5	23.5								0.09		6.83	44.7	1160	6.2	92.0188	92.9	0.10937	0.297	0.1088	2.8	10.2	GH				2.74082	8.32379	2.60429	9.75221
F866	Finsch	Pearson et al., 1995	-28.5	23.5												1103	5.8		92.9	0.11012	0.155	0.1098	2.7	4.1					2.64141	4.06518	2.45764	3.93388
FRB921	Premier	Pearson et al., 1995 Dante and O’Neill,1996	-26	29								0.3		6.14	35.7	1055	4.2	90.849	0	0.12139	0.095	0.1195	1.2	1.2	GW				1.12744	1.44055	1.01622	0.963032
FRB1350	Premier	Pearson et al., 1995 Dante and O’Neill,1996	-26	29								0.14		6.84	42.6	701	2.1	91.5973	91.7	0.1137	0.038	0.113	2.2	2.3	SGL				2.16461	2.36879	1.98594	2.08062
PHN1569	Thaba Putsoa	Pearson et al., 1995	-29	29												949	3.8		92.9	0.10937	0.145	0.1092	2.8	4.3					2.74082	4.07478	2.54568	3.95039
BD2125	Mothae	Pearson et al., 1995	-29	29												1032	4.7		0	0.13668	10.3	0.1215	0.9	0.1					-0.989567	0.0430544	0.71467	0.0634583
PHN2302	Liqhobong	Pearson et al., 1995	-28.62	28.62												994	4.3		92.8	0.1069	0.047	0.1068	3.1	3.5					3.06705	3.43001	2.89652	3.26362
PHN2823	Liqhobong	Pearson et al., 1995	-28.62	28.62															93.1	0.1103	0.038	0.1102	2.6	2.9					2.61752	2.86342	2.39888	2.63429
PHN2825	Liqhobong	Pearson et al., 1995	-28.62	28.62												627	1		95.6	0.10614	0.323	0.1057	3.3	15.6					3.16707	11.6039	3.05664	15.2404
PHN5273	Premier	Pearson et al., 1995 Dante and O’Neill,1996	-26	29								0		6.52	43.2			92.194	92.2	0.1121	0.048	0.1112	2.5	2.7	GH				2.37817	2.66817	2.25173	2.40846
PHN5595	Jagersfontein	Pearson et al., 1995	-30	25.5												1235	5.9		93.2	0.11465	0.153	0.1144	2	3.2					2.03745	3.12222	1.7784	2.82821
FRB909	Premier	Pearson et al., 1995 Dante and O’Neill,1996	-26	29								0.21		8.1	42.1	1395	6.2	90.0533	0	0.11667	0.144	0.1139	2.1	2.6	GL				1.76616	2.62716	1.8526	2.25978
PHN1596	Thaba Putsoa	Pearson et al., 1995	-29	29												1563	6.9		90.6	0.11175	0.06	0.1117	2.4	2.8					2.42479	2.80585	2.17801	2.55422
PHN1611	Thaba Putsoa	Pearson et al., 1995	-29	29												1472	6.5		88.2	0.12572	1.09	0.1241	0.5						0.535464	-0.355531	0.320373	-0.0413151
PHN5239	Premier	Pearson et al., 1995 Dante and O’Neill,1996	-26	29								0.17		7.22	44.2	1398	6.7	91.4428	91.7	0.1104	0.311	0.1043	3.5	11.1	GL				2.60425	8.77289	3.25982	10.648
PHN5267	Premier	Pearson et al., 1995 Dante and O’Neill,1996	-26	29								0.2		7.51	43	1375	6.6	90.8821	91.3	0.11775	0.057	0.1166	1.7	1.7	GL				1.62061	1.86252	1.4508	1.4935
K7-318	Jagersfontein	Pearson et al., 1995	-30	25.5															91.6	0.11687	2.02	0.114	2.1						1.73924	-0.483419	1.83777	-0.34507
BD2234	Monastery	Carlson and Moore, 2004	-29	27						1.34				6.79	42.52	744	2.64	91.778	92.9	0.11222	0.1251		2.37	3.27	GL			Miesel et al., 2001, 187Re/188Os = 0.43464, 187Os/188Os =0.1296	2.35344	3.279	2.10126	3.05996
BD2227	Monastery	Carlson and Moore, 2004	-29	27						1.13				6.76	43.19	811	3.05	91.9281	92.7	0.10883	0.0617		2.8	3.24	GH				2.80192	3.25312	2.5999	3.07275
ROM-69	Monastery	Carlson and Moore, 2004	-29	27						1.02				7.08	42.94	848	3.33	91.5333	92.2	0.10889	0.0316		2.8	3	GL				2.79401	3.00767	2.59111	2.81281
BD2242	Monastery	Carlson and Moore, 2004	-29	27						0.83				6.84	43.84	885		91.9516	92.6	0.10737	0.1448		3.02	4.43	L				2.99404	4.43568	2.81338	4.39958
ROM-189	Monastery	Carlson and Moore, 2004	-29	27						3.92				5.88	35.49	890	3.65	91.4958	92.5	0.11757	0.075		1.65	1.97	GH				1.63877	1.97496	1.30579	1.61024
ROM-210	Monastery	Carlson and Moore, 2004	-29	27						1.67				7.15	43.37	903	3.75	91.5343	92.5	0.10816	0.0553		2.9	3.29	GL				2.89016	3.3001	2.69796	3.1292
ROM194A	Monastery	Carlson and Moore, 2004	-29	27						1.74				7.18	41.61	913	3.76	91.1741	92.4	0.11112	1.0209		2.7	-1.92	GL				2.49933	-1.92253	2.26351	-1.45775
ROM-68	Monastery	Carlson and Moore, 2004	-29	27						1.06				5.95	44.24	935	3.83	92.9843	93.6	0.10777	0.0643		2.95	3.43	GL				2.94147	3.43781	2.75497	3.28037
ROM-03	Monastery	Carlson and Moore, 2004	-29	27						2.83				6.29	39.79	931	3.89	91.8541	92.6	0.11934	0.0226		1.4	1.47	GL				1.40045	1.47632	1.04028	1.10328
K2	Kimberly	Simon et al, 2007	-29	25	80	19	0	1.3	0.5	0.5		2.48		3.99	44.69			92.7558	92.9	0.1111	0.3842	0.1106	2.5	21.8	SH	H	S	Miesel et al., 2001, 187Re/188Os = 0.43464, 187Os/188Os =0.1296	2.50198	18.7546	2.34006	62.6842
K6	Kimberly	Simon et al, 2007	-29	25	65	34	0	0.9	0.6	0.8		1.86		4.15	43.06			92.9479	93	0.1091	0.0275	0.109	2.7	2.9	SH	H	S		2.76632	2.94866	2.57499	2.74894
K8	Kimberly	Simon et al, 2007	-29	25	65	32	0	1.7	1	0.91		2.23		3.98	43.02			92.7586	93.1	0.1081	0.107	0.108	2.9	3.8	SH	H	S		2.89806	3.81498	2.72136	3.69087
K9	Kimberly	Simon et al, 2007	-29	25						0.5		3.28		3.23	41.82			92.3429		0.1082	0.0629	0.1081	2.8	3.3					2.8849	3.35961	2.70673	3.19258
K1	Kimberly	Simon et al, 2007	-29	25	55	35	7.6	2.5	0	1.68		1.02		5.05	41.03			92.4559	92.9	0.1096	0.059	0.1095	2.7	3.1	GH	H	G		2.70035	3.11365	2.50167	2.91658
K13	Kimberly	Simon et al, 2007	-29	25	64	28	5.7	2.1	0	1.17		2.42		4.42	41.97			91.896	92.2	0.1073	0.0186	0.1073	3	3.1	GH	H	G		3.00324	3.13406	2.8236	2.96069
K14	Kimberly	Simon et al, 2007	-29	25	64	28	5.7	2.1	0	1.29		2.4		4.38	42.2			92.0018	92	0.1075	0.0658	0.1084	2.8	3.3	GH	H	G		2.97696	3.49287	2.66285	3.34198
K24	Kimberly	Simon et al, 2007	-29	25	68	22	7.4	2.3	0	1.59		1.83		4.96	42.42			91.9649	92.3	0.1082	0.0095	0.1082	2.8	2.9	GH	H	G		2.8849	2.94781	2.69211	2.75739
K25	Kimberly	Simon et al, 2007	-29	25	56	35	6.8	1.7	0	1.44		1.59		4.49	40.37			92.3978	92.9	0.1092	0.091	0.1091	2.7	3.4	GH	H	G		2.75313	3.46153	2.56033	3.29353
K27	Kimberly	Simon et al, 2007	-29	25	61	30	7.1	2.8	0	1.49		0.91		5.78	40.6			91.6439	92	0.1075	0.183	0.1075	2.9	3.1	GH	H	G		2.97696	5.05278	2.7944	5.13432
K12	Kimberly	Simon et al, 2007	-29	25						1.47		2.49		3.34	41.43			92.9744		0.1085	0.0397	0.10846	2.8	3.1					2.8454	3.1241	2.65407	2.93912
K18	Kimberly	Simon et al, 2007	-29	25	70	19	10.2		0	1.18		2.34		3.17	43.48			93.6271	93.6	0.1073	0.0846	0.1072	3	3.7	GH	H	G		3.00324	3.70708	2.83819	3.57696
GP402	Kimberly	Simon et al, 2007	-29	25	63	24	10.4		0	2.25		1.4		4.2	42.09			93.2166	93.6	0.1118	0.8212	0.1105	2.5	2.8	GH	H	G		2.40919	-2.8296	2.35477	-2.05036
K15	Kimberly	Simon et al, 2007	-29	25	57	33	7.4	2.14	0	1.28		2.63		3.8	40.65			92.1573	92.5	0.1101	0.3397	0.1095	2.7	34.6	GH	H	G		2.6343	11.2128	2.50167	16.0017
K17	Kimberly	Simon et al, 2007	-29	25	65	26	7.5	1.4	0	1.41		2.94		3.65	41.53			92.1625	92.9	0.1114	0.0419	0.1113	2.4	2.7	GH	H	G		2.46223	2.71905	2.23699	2.48249
K3	Kimberly	Simon et al, 2007	-29	25	56	24	1.4	18.8	0	2.05		2.2		4.88	36.61			90.4884	87.9	0.1125	0.0644	0.1124	2.3	2.7	GL	L	G		2.31625	2.71017	2.07467	2.45616
K19	Kimberly	Simon et al, 2007	-29	25	50	27	21	2.1	0	4.46		2.57		5.03	36.88			89.9531	91.2	0.1152	0.1563	0.1149	1.9	3	GH	H	G		1.95641	3.0277	1.7041	2.73335
K21	Kimberly	Simon et al, 2007	-29	25	49	29	9.6	12.2	0	2.43		2.52		4.57	36.45			90.4785	91.1	0.1189	1.634	0.1165	1.7	0.6	GL	L	G		1.45978	-0.537903	1.46573	-0.353953
K5	Kimberly	Simon et al, 2007	-29	25						1.44		2.78		4.97	38.14			90.0985		0.1126	1.1862	0.1108	2.5	1.4					2.30296	-1.37331	2.31063	-1.03729
K7	Kimberly	Simon et al, 2007	-29	25						1.25		1.95		3.93	40.15			92.6416		0.1086	0.1494	0.1084	2.8	4.3					2.83223	4.264	2.66285	4.19719
K10	Kimberly	Simon et al, 2007	-29	25	63	34	0	1.9	0.6	0.85		1.6		4.35	42.51			92.9018	92.8	0.1085	0.3484	0.108	2.9	14.5	SH	H	S		2.8454	13.1373	2.72136	20.2938
K11	Kimberly	Simon et al, 2007	-29	25	64	32	0	2.8	0.8	0.48		2.34		4.12	42.24			92.3632	92.1	0.1089	0.0804	0.1088	2.8	3.4	SH	H	S		2.79269	3.40885	2.60429	3.23926
K16	Kimberly	Simon et al, 2007	-29	25	52	41	0	4.6	2.8	1.55		2.29		4.13	40.11			92.0315	92	0.1091	0.094	0.1089	2.7	3.5	SH	H	S		2.76632	3.50777	2.58964	3.34477
K20	Kimberly	Simon et al, 2007	-29	25	48	45	0	4.3	3	1.72		2.32		3.98	39.58			92.081	92.4	0.1133	0.3535	0.1128	2.2	12.2	SH	H	S		2.20986	10.988	2.01553	17.1906
K22	Kimberly	Simon et al, 2007	-29	25						0.79		4.6		3.51	39.67			90.2388		0.1126	0.118	0.1124	2.3	3.1					2.30296	3.13908	2.07467	2.90358
K23	Kimberly	Simon et al, 2007	-29	25	71	24	0	2.8	0	0.3		3.83		3.75	41.51			91.1365	91.6	0.1096	0.1082	0.1094	2.7	3.6	H	H			2.70035	3.56924	2.51634	3.40741
LT98/5	Letseng-le-Terai (N.Lesotho)	Griffin et al., 2004	-29	29						1.55				5.83	41.33	1002	4.18	92.6669	92.6	0.11033	0.1625	0.11009	2.48	4.04	GL			Shirey and walker, 1998, 187Re/188Os =0.40186, 187Os/188Os = 0.1270	2.47407	4.04117	2.41505	4.00671
LT98/7	Letseng-le-Terai (N.Lesotho)	Griffin et al., 2004	-29	29												1005	4.16		92.7						GL	This sample has analysis for sulfides but not WR
LT98/8	Letseng-le-Terai (N.Lesotho)	Griffin et al., 2004	-29	29						0.66				6.53	44.26	1125	4.61	92.3559	92.3	0.11382	0.144	0.11361	1.97	2.99	GL				1.96741	2.99217	1.8956	2.91938
LT98/10	Letseng-le-Terai (N.Lesotho)	Griffin et al., 2004	-29	29						0.9				6.79	42.39	1191	5.34	91.7549	91.6	0.11966	0.4323	0.11901	1.18		GH				1.18172	-16.5621	1.08987	-10.7454
LT98/12	Letseng-le-Terai (N.Lesotho)	Griffin et al., 2004	-29	29						0.83				6.07	43.44	990	4.16	92.7308	92.8	0.10982	0.1398	0.10961	2.55	3.82	GH				2.54284	3.81141	2.48553	3.7713
LT98/13	Letseng-le-Terai (N.Lesotho)	Griffin et al., 2004	-29	29						1.08				7.75	42.25	1372	5.31	90.6696	90.6	0.11775	0.1249	0.11757	1.39	1.97	GL				1.39224	1.97195	1.30579	1.86675
LT98/14	Letseng-le-Terai (N.Lesotho)	Griffin et al., 2004	-29	29						0.88				5.97	43.12	1007	4.59	92.7927	92.7	0.11017	0.2313	0.10982	2.51	5.65	GL				2.51276	5.64855	2.45471	5.6938
LT98/15	Letseng-le-Terai (N.Lesotho)	Griffin et al., 2004	-29	29						0.98				6.06	43.4	995	4.32	92.7357	92.6	0.11015	0.064		2.48	2.92	GL				2.46547	2.92131	2.40623	2.86414
LBM-12	Matsoku (N.Lestho)	Griffin et al., 2004	-29	29						3.6				14.1	33.45	1169	5.19	80.8751	83.5						GL	This sample has analysis for sulfides but not WR
JGF-98/6	Jagersfontein	Griffin et al., 2004	-30	25.5						0.86				6.84	42.48	1081	5.02	91.7153	92.6	0.15176	0.377	0.15119			GH				-3.72647	-331.083	-3.94978	#NUM!
FRB1500	Finsch	Griffin et al., 2004	-28.5	23.5						1.67				5.54	40.65	1120	5.03	92.8974	92.7	0.11146	0.063	0.11133	2.3	2.7	GL				2.29608	2.69143	2.23257	2.6276
FRB1506	Finsch	Griffin et al., 2004	-28.5	23.5						2.07				6.86	40.11	1157	5.29	91.2453	91.2	0.11978	0.186	0.11941	1.13	1.99	GL				1.12311	1.97481	1.02976	1.83858
FRB1508	Finsch	Griffin et al., 2004	-28.5	23.5						0.84				5.6	40.41	1126	5.51	92.7865	93.1	0.11074	0.065	0.11061	2.4	2.83	GH				2.39949	2.82956	2.33859	2.76948
FRB1510	Finsch	Griffin et al., 2004	-28.5	23.5						2.14				6.73	39.22	1128	5.05	91.2188	91.5	0.11952	0.381	0.11877	1.11	18.1	GL				1.21686	18.3938	1.12591	27.6827
FRB1512	Finsch	Griffin et al., 2004	-28.5	23.5						1.39				6.4	41.39	1101	4.88	92.0179	92	0.11056	0.116	0.11033	2.42	3.36	GH				2.43966	3.35641	2.37977	3.30382
FRB1514	Finsch	Griffin et al., 2004	-28.5	23.5						0.75				6.14	43.54	1073	4.83	92.6688	92.7	0.11839	0.396	0.1176	1.39	54.4	GL				1.38787	54.2574	1.3013	#NUM!
FRB1516	Finsch	Griffin et al., 2004	-28.5	23.5						0.7				6.05	44.04	1141	5.5	92.8447	92.4	0.11245	0.121	0.11221	2.17	3.03	GH				2.16943	3.03169	2.10273	2.96648
FRB1518	Finsch	Griffin et al., 2004	-28.5	23.5												940	4.42		92.8						GH	This sample has analysis for sulfides but not WR
KDB/6	Kimberley	Griffin et al., 2004	-29	25						1.92				6.65	41.83	1258	5.12	91.8117	91.8						GL	This sample has analysis for sulfides but not WR
BD2332	Kimberley	Griffin et al., 2004	-29	25						0.83				6.12	43.95	1175	3.9	92.7542	92.2						GH	This sample has analysis for sulfides but not WR
BD2329	Kimberley	Griffin et al., 2004	-29	25						1.02				5.79	43.94	1015	3	93.1165	93						GH	This sample has analysis for sulfides but not WR
BD2374	Kimberley	Griffin et al., 2004	-29	25						1.03				5.71	43.76	775	2.2	93.1791	93						H	This sample has analysis for sulfides but not WR
BD2443	Kimberley	Griffin et al., 2004	-29	25						1.46				5.37	41.36	982	4.81	93.2108	93						GH	This sample has analysis for sulfides but not WR
BD2452	Kimberley	Griffin et al., 2004	-29	25						1.03				8.93	40.65	1200	5	89.0281	90.1						L	This sample has analysis for sulfides but not WR
LT98/3	Letseng-le-Terai (N.Lesotho)	Griffin et al., 2004	-29	29												1025	4.3		92.2							This sample has analysis for sulfides but not WR
PHN3016	Abbotsford	Janney et al., 2010	-30.32	28.65	77.6	15.4	2.3	3.8	0.9	0.65				8.13	44.15	835	2.56	90.6368	92.3	0.11742	0.1812	0.11697	1.72	2.81	GSH	H	GS	Miesel et al., 2001, 187Re/188Os = 0.43464, 187Os/188Os =0.1296	1.71678	2.81035	1.39553	2.44484
PHN3020	Abbotsford	Janney et al., 2010	-30.32	28.65	76.3	13.8	3.4	5.2	1.3	0.97				8.92	42.78	826	2.82	89.5277	91.7	0.11199	0.0549	0.11185	2.4	2.72	GSL	L	GS		2.39898	2.71631	2.15588	2.47548
PHN3023	Abbotsford	Janney et al., 2010	-30.32	28.65	75.5	8.3	6.2	9	1	1.31				8.41	41.47	938	3.93	89.7852	91.8	0.11189	0.5175	0.1106	2.56	-14.57	GSL	L	GS		2.56437	-14.5645	2.34006	-7.29153
PHN3040	Abbotsford	Janney et al., 2010	-30.32	28.65	68.3	12.3	8.5	10.9		2.31				8.38	40.05	1329	4.13	89.4949	90.7						GL	L	G
PHN4377	Abbotsford	Janney et al., 2010	-30.32	28.65	59.5	29.8	4.3	6.3	0.1	1.41				8.04	39.42	1292	3.97	89.7328	91.5	0.1192	0.3246	0.11839	1.53	5.39	GSL	L	GS		1.52619	5.38972	1.18293	5.8977
PHN4402	Abbotsford	Janney et al., 2010	-30.32	28.65	66.7	25.9	5.3	2.2		1.32				9.03	41.41	1274	4.09	89.1001	90.8	0.11903	0.1422	0.11867	1.49	2.13	GH	H	G		1.48854	2.12651	1.14092	1.69593
PHN4404	Abbotsford	Janney et al., 2010	-30.32	28.65												1216	3.75		91.3				1.73	2.78
PHN4438	Abbotsford	Janney et al., 2010	-30.32	28.65	64.8	29.9	4.4	0.9		1.28				7.89	41.23	1272	4.18	90.3052	91.6	0.11631	0.2994	0.11556	1.91	5.6	GH	H	G		1.90543	5.60032	1.60589	6.06608
PHN4442	Abbotsford	Janney et al., 2010	-30.32	28.65	66.2	23.8	5.8	2.4	1.8	1.28				8.04	40.31	597	1.87	89.9367	92.6	0.11624	0.4234	0.11518	1.96	45.05	GSH	H	GS		1.95617	45.1791	1.66245	-23.263
PHN4443	Abbotsford	Janney et al., 2010	-30.32	28.65												1295	4.33		91
PHN4444	Abbotsford	Janney et al., 2010	-30.32	28.65	69.7	25.7	4	0.5		1.12				8.85	42.11	1301	3.92	89.4533	90.9	0.12475	2.5649	0.11833	1.53	-0.14	GH	H	G		1.53426	-0.136856	1.19193	-0.0400754
PHN4446	Abbotsford	Janney et al., 2010	-30.32	28.65	13.9	34.5	33.3	17.6	0.8*	7.84				10.35	25.11	937	2.72	81.2192	85.5						GSL	L	GS
PHN3106B	Clarkton	Janney et al., 2010	-29.36	30.01	81.4			16.8	1.8							693	1.2		92.1						SW	W	S
PHN3107A	Clarkton	Janney et al., 2010	-29.36	30.01	76.8	21.2	1.1		0.9							1229	4.37		91.2						GSH	H	GS
PHN3069	Ramatseliso	Janney et al., 2010	-28.94	30.04	79.4	16.5	3.4	0.6	—	0.88				8.36	45.28	905	1.47	90.6145	92	0.11489	0.4167	0.11385	2.13	34.97	GSH	H	GS		2.13342	34.9758	1.86002	-37.5928
PHN3060	Ramatseliso	Janney et al., 2010	-28.94	30.04	74.3	21		3.4	1.2							1346	4.14		91.4						SH	H	S
PHN3061	Ramatseliso	Janney et al., 2010	-28.94	30.04												1334	4.31		90.8
PHN4473	Ramatseliso	Janney et al., 2010	-28.94	30.04	61.9	24.2	7.5	6.3		2.02				8.78	41.1	1299	4.3	89.2982	90.9						GL	L	G
PHN4474	Ramatseliso	Janney et al., 2010	-28.94	30.04	80.2	17.2	2.5	0.1		0.6				9.34	46.6	1252	3.67	89.8924	91.2						GH	H	G
PHN4475	Ramatseliso	Janney et al., 2010	-28.94	30.04	69.6	20.8	7.3	2.3		1.92				8.29	41.5	1274	4.35	89.9228	90.8						GH	H	G
UINT4	Uintjiesberg	Janney et al., 2010	-30.82	22.53	—	76.3	20.9	2.8		5.41				6.08	31.31	863	2.63	90.1763		0.12157	0.3319	0.12102	1.17	4.49	GD	D	G		1.1716	4.48929	0.787182	4.42628
UINT-8	Uintjiesberg	Janney et al., 2010	-30.82	22.53	51.4	39.1	4.7	4	0.8	1.53				7.59	40.03	1029	3.48	90.3857	92	0.11224	0.2885	0.11176	2.41	6.71	GSH	H	GS		2.41091	6.70891	2.16916	7.56714
HBR-1	Hebron	Janney et al., 2010	-31.27	22.56	74.2	20.1	1	4	0.7	0.88				9.01	43.95	1002	3.35	89.6855	91.3	0.11587	0.0895	0.11577	1.88	2.34	GSH	H	GS		1.87737	2.33716	1.5746	2.01291
HBR-2	Hebron	Janney et al., 2010	-31.27	22.56	56.7	33.4	4.8	4.5	0.6	1.78				7.48	41.81	972	2.97	90.8789	92	0.11345	0.1435	0.11328	2.21	3.23	GSH	H	GS		2.20922	3.23342	1.94449	2.99859
HBR-3	Hebron	Janney et al., 2010	-31.27	22.56	64.3	23.7	3.1	8.9		1.21				7.87	41.58	903	2.51	90.401	91.4	0.12024	0.0534	0.12018	1.29	1.45	GL	L	G		1.28508	1.45339	0.913865	1.04612
HBR-4R	Hebron	Janney et al., 2010	-31.27	22.56	60.3	28.2	5.3	3.9	2.4	2.04				7.87	41.67	916	2.65	90.4198	91.8	0.11179	0.0189	0.11176	2.41	2.51	GSH	H	GS		2.41091	2.51392	2.16916	2.27223
HBR-5	Hebron	Janney et al., 2010	-31.27	22.56	66.9	19.8	9.8	3.5		2.26				8.11	42.7	924	2.67	90.3709	92.1	0.11317	0.1429	0.11301	2.25	3.28	GH	H	G		2.2451	3.28141	1.98446	3.05561
HBR-11	Hebron	Janney et al., 2010	-31.27	22.56	60	19.1	11.9	5.9	3.1	3.6				8.73	39.73	865	2.21	89.0258	91.3	0.12559	0.1689	0.1254	0.58	0.9	GSL	L	GS		0.576367	0.896782	0.122249	0.163601
HBR-12	Hebron	Janney et al., 2010	-31.27	22.56	59.3	28.2	7	4.9	0.6	2.07				8.35	40.06	859	2.43	89.5309	90.8	0.1169	0.053	0.11683	1.73	1.96	GSH	H	GS		1.73554	1.96159	1.41645	1.62261
FRB0795	Hebron	Janney et al., 2010	-31.27	22.56												823	2.25		91.1
XMW-7	Melton Wold	Janney et al., 2010	-31.5	22.75	66.6	27.2	4.1	2		0.78				8	38.86	1028	3.93	89.6466	91.4	0.11772	0.0219	0.11766	1.62	1.7	GH	H	G		1.62424	1.70061	1.29232	1.35834
XMW-8	Melton Wold	Janney et al., 2010	-31.5	22.75						1.08				8.41	33.58	1221	5.7	87.6808	91.4	0.1207	0.207	0.12018	1.29	2.3					1.28508	2.29551	0.913865	1.75475
XMW-13	Melton Wold	Janney et al., 2010	-31.5	22.75	66	30.2	1.9	1.8	0.2	0.54				7.86	39.52	1162	4.63	89.9624	91.3	0.11707	0.0275	0.11701	1.71	1.82	GSH	H	GS		1.71142	1.81652	1.38955	1.48335
MW-1	Melton Wold	Janney et al., 2010	-31.5	22.75						3.05				5.94	32.42	1238	5.12	90.6794		0.12295	0.0466	0.12283	0.93	1.02					0.926338	1.01822	0.513296	0.561501
GANS-1	Gansfontein	Janney et al., 2010	-31.7	21.92	72.8	18.8	0.9	6.7	0.8	0.48				8.37	43.26	1228	4.81	90.2085	91.9	0.12042	0.1915	0.12013	1.29	2.22	GSL	L	GS		1.29183	2.21862	0.921398	1.70255
GANS-2R	Gansfontein	Janney et al., 2010	-32.5	21	81.8	15.2	0.5	2.2	0.2	0.4				8.54	45.79	834	2.58	90.5282	90.3	0.11894	0.0288	0.1189	1.46	1.55	GSH	H	GS		1.45759	1.55378	1.10639	1.18669
GANS-9	Gansfontein	Janney et al., 2010	-32.5	21	—	37.2	20.1	42.7		5.68				9.56	21.28	974	3.47	79.8704		0.16081	0.1124	0.16065	-4.44	-6.1	GD	D	G		-4.44189	-6.10151	-5.51551	-7.91962
HOD-1R	Hoedkop	Janney et al., 2010	-29.5	19	72.6	24.5	1.5	1.4		0.61				8.43	45.13	822	2.47	90.5149	91.6	0.11849	0.0928	0.11837	1.53	1.92	GH	H	G		1.52888	1.91614	1.18593	1.52514
HOD-2	Hoedkop	Janney et al., 2010	-29.5	19	72	20.3	3.8	3.9		1.08				8.11	44.43	1266	4.52	90.711	91.9	0.11457	0.2735	0.11421	2.09	5.33	GH	H	G		2.08549	5.3318	1.8066	5.60146
HOD-3	Hoedkop	Janney et al., 2010	-29.5	19	79	13.1	2.5	5.4		0.72				7.97	45	1262	4.79	90.9621	91.9	0.11624	0.9363	0.11499	1.98	-1.62	GL	L	G		1.98152	-1.62237	1.69072	-1.10936
HOD-4	Hoedkop	Janney et al., 2010	-29.5	19	79.9	12.7	2.8	4.5		0.79				7.92	45.07	1230	4.98	91.0264	92.1	0.11655	0.5006	0.11588	1.86	-13.38	GH	H	G		1.86266	-13.3825	1.55821	-5.60728
HOD-5	Hoedkop	Janney et al., 2010	-29.5	19	73.1	18.5	5.2	1.2	2	1.58				8.64	44.05	993	3.08	90.0873	91.6	0.11922	0.3511	0.11875	1.48	6.98	GSH	H	GS		1.47778	6.97786	1.12892	9.37304
HOD-11	Hoedkop	Janney et al., 2010	-29.5	19	72	20.8	6.6	0.7		1.65				7.96	44.5	964	2.69	90.8802	92.1	0.47147	21.42	0.4429	-76.3	0.97	GH	H	G		-76.3514	0.969995	-98.7697	0.977581
RIET-2	Rietfontein	Janney et al., 2010	-26.75	20.04	65.2	18.3	11.3	5.2		2.69				8.06	41.77	685	2.1	90.2323	91.7	0.12177	0.2835	0.1214	1.12	3.02	GL	L	G		1.12019	3.01889	0.729784	2.39339
RIET-1	Rietfontein	Janney et al., 2010	-26.75	20.04	69.6	27		2.1	1.3	0.78				7.72	41.72			90.5954	92	0.11882	0.0831	0.11871	1.48	1.81	SH	H	S		1.48316	1.80964	1.13492	1.41537
GANS-3	Gansfontein	Janney et al., 2010	-31.7	21.92	67.6	26.5		3.1	2.8	0.37				8.82	43.07			89.6955	91.9	0.11857	0.1307	0.11838	1.53	2.14	SH	H	S		1.52754	2.13513	1.18443	1.72501
HOD-6	Hoedkop	Janney et al., 2010	-29.29	18.71	76.5	20.4		2.5	0.6	1.62				7.92	44.18			90.8621	91.6	0.11988	0.0754	0.11978	1.34	1.6	SH	H	S		1.33904	1.59959	0.974097	1.18492
HOD-7	Hoedkop	Janney et al., 2010	-29.29	18.71	72.5	23.1		3.2	1.2	0.59				12.37	41.26			85.6024	87.1	0.11078	0.1433	0.11059	2.57	3.75	SH	H	S		2.56569	3.74911	2.34153	3.60519
HOD-8	Hoedkop	Janney et al., 2010	-29.29	18.71	76.9	21.4		1.2	0.5	0.67				7.73	45.9			91.3678	91.9	0.11811	0.0133	0.11809	1.57	1.61	SH	H	S		1.56651	1.61245	1.22791	1.26744
HOD-9	Hoedkop	Janney et al., 2010	-29.29	18.71	70	28.3		0.7	1	0.85				7.84	45.77			91.233	91.9	0.11776	0.0397	0.1177	1.62	1.77	SH	H	S		1.61888	1.77011	1.28633	1.41944
HOD-10	Hoedkop	Janney et al., 2010	-29.29	18.71	72.7	22.4		3.5	1.5	1.18				8.11	45.38			90.8878	91.4	0.11976	0.2133	0.11947	1.38	2.6	SH	H	S		1.38083	2.60325	1.02074	2.12042
GSF-4	Gansfontein	Janney et al., 2010	-31.7	21.92	69.3	21.8		6.7	2.2	1.26				8.62	42.48			89.7797	91.4	0.11831	0.0269	0.11827	1.54	1.64	SL	L	S		1.54232	1.63681	1.20093	1.28194
GSF-5	Gansfontein	Janney et al., 2010	-31.7	21.92	80	16.6		2.6	0.7	0.84				7.21	46.34			91.9722	92.6	0.11138	0.0994	0.11123	2.48	3.17	SH	H	S		2.48107	3.17061	2.24731	2.96174
GSF-8	Gansfontein	Janney et al., 2010	-31.7	21.92	70.8	24		4.3	0.9	0.93				7.51	44.42			91.337	92.2	0.1204	0.2444	0.12003	1.31	2.83	SH	H	S		1.30532	2.82518	0.936459	2.30737
UINT-5	Uintjiesberg	Janney et al., 2010	-30.82	22.53	69.3	27.2		2	1.6	1.26				7.41	43.36			91.2515	92.4	0.1203	0.3861	0.11965	1.36	10.39	SH	H	S		1.35657	10.3921	0.99366	39.669
XMW-19	Melton Wold	Janney et al., 2010	-31.5	22.75						1.29				6.06	33.93			90.8929		0.12111	0.124	0.1208	1.2	1.62					1.20134	1.61509	0.820386	1.12765
XMW-22	Melton Wold	Janney et al., 2010	-31.5	22.75	42.3	44.8	12.9			2.67				6.57	36.05			90.7243		0.11795	0.1984	0.11746	1.65	2.88	GSL	L	GS		1.65108	2.88151	1.32225	2.49978
MW-2	Melton Wold	Janney et al., 2010	-31.5	22.75						1.46				6.25	30.99			89.8359	91	0.1143	0.1062	0.11403	2.11	2.73					2.10946	2.72762	1.83332	2.44527
UINT-10	Uintjiesberg	Janney et al., 2010	-30.82	22.53	61.2	31.5		5.3	2.1	1.44				7.84	40.96			90.3033	91.7	0.12305	0.4754	0.12225	1	–10.70	SL	L	S		1.00504	-10.7047	0.601196	-2.32237
JAR09053	Uintjiesberg	Janney et al., 2010	-30.82	22.53	69	27.8		2.1	1.1	0.9				7.62	42.68			90.8959	91.9	0.1189	0.2273	0.11852	1.51	3.01	SH	H	S		1.50871	3.01098	1.16343	2.597
KLIP-5	Klipfontein	Janney et al., 2010	-31.08	22.17		11.4	33	55.6		10.32				7.91	16.89			79.1935		0.31951	1.715	0.31694	-33.78	8.31	GL	L	G		-33.7796	8.30561	-39.9579	8.18826
PHN3024	Abbotsford	Janney et al., 2010	-30.32	28.65	73.6			23.2	3.2*	1.3				13.51	33.58			81.5859	84.7	0.11576	0.3161	0.11497	1.98	6.59	SW	W	S		1.98419	6.59346	1.69369	7.69761
PHN3046	Abbotsford	Janney et al., 2010	-30.32	28.65	61	26.8		11.5	0.8*	2.15				8.43	38.55			89.0728	84.2	0.11969	0.3818	0.11874	1.48	10.21	SL	L	S		1.47912	10.2005	1.13042	28.74
PHN4436	Abbotsford	Janney et al., 2010	-30.32	28.65	77.9	19.7	1.4	0	1	0.64				9.1	42.89			89.3633	91.1	0.11731	0.1759	0.11687			GSH	H	GS		1.73018	2.77854	1.41047	2.41547
PHN3039†	Abbotsford	Janney et al., 2010	-30.32	28.65	81.7	15.7		1.3	1.2	0.14				7.6	44.5			91.2566	93.2						SH	H	S
PHN3085A†	Abbotsford	Janney et al., 2010	-30.32	28.65	75.7	23			1.3	0.25				7.37	46.9			91.8985	93.1						SH	H	S
KLIP-2	Klipfontein	Janney et al., 2010	-31.08	22.17																0.11966	0.0769	0.11955	1.37	1.64					1.37005	1.64206	1.0087	1.23152
KLIP-3	Klipfontein	Janney et al., 2010	-31.08	22.17																0.12011	0.0359	0.12005	1.3	1.41					1.30262	1.40953	0.933447	1.01672
KLIP-4	Klipfontein	Janney et al., 2010	-31.08	22.17																0.11777	0.0024	0.11777	1.61	1.62					1.60948	1.61828	1.27585	1.28362
PHN4447	Abbotsford	Janney et al., 2010	-30.32	28.65															88.8	0.11421	0.2283	0.11364	2.16	4.31					2.16136	4.30455	1.89115	4.23285
PHN4448	Abbotsford	Janney et al., 2010	-30.32	28.65															91	0.1184	0.1051	0.11814	1.56	2					1.55979	2.00218	1.22042	1.60788
GSF-5R	Gansfontein	Janney et al., 2010	-31.7	21.92																0.11009	0.1543	0.10986	2.66	4.03					2.66206	4.02919	2.44883	3.92977
JJG4362	Markt	Janney et al., 2010	-30.25	22.37																0.11289	0.0179	0.11286	2.27	2.36					2.26502	2.35612	2.00665	2.09626
MKT-3	Markt	Janney et al., 2010	-30.25	22.37																0.12037	0.021	0.12033	1.26	1.32					1.26483	1.32257	0.891263	0.9349
MKT-7	Markt	Janney et al., 2010	-30.25	22.37																0.11399	0.1005	0.1138	2.14	2.73					2.14007	2.73533	1.86743	2.45968
MKT2-6	Markt	Janney et al., 2010	-30.25	22.37																0.14598	2.774	0.14066	-1.54	0.42					-1.54478	0.418936	-2.25368	0.496461
UINT-1	Uintjiesberg	Janney et al., 2010	-30.82	22.53															92.3	0.1226	0.1081	0.12242	0.98	1.27					0.981982	1.27059	0.575446	0.755293
UINT-3	Uintjiesberg	Janney et al., 2010	-30.82	22.53															91.6	0.12133	0.0209	0.12129	1.13	1.19					1.13507	1.18608	0.746405	0.781743
LB-11	Labait, Tanzania	Chesley et al., 1999	-5	35						0.84						990		92	92.3	0.1119	0.1376		2.24	3.4	SH			Pearson et al., 1995, 187Re/188Os =0.401, 187Os/188Os =0.1270	2.24796	3.40709	2.1485	3.27756
LB-1	Labait, Tanzania	Chesley et al., 1999	-5	35						0.03								93	92.1	0.1098	0.147		2.53	4	H				2.55302	4.00502	2.45764	3.88303
LB-9	Labait, Tanzania	Chesley et al., 1999	-5	35						0.36								92.9	93.3	0.1102	0.56		2.49		H				2.49504	-6.54962	2.39888	-6.02249
LB-14	Labait, Tanzania	Chesley et al., 1999	-5	35						0.33						990		92.4	92.9	0.1081	0.0566		2.8	3.25	H				2.79885	3.25183	2.70673	3.15118
LB-16	Labait, Tanzania	Chesley et al., 1999	-5	35						0.6						1260		92	91.9	0.1107	0.9416		2.42		H				2.42247	-1.82965	2.32535	-1.71841
LB-17	Labait, Tanzania	Chesley et al., 1999	-5	35						0.56						1070		91.5	91.1	0.112	0.3198		2.23		H				2.2334	10.6904	2.13374	10.7228
KAT-1	Labait, Tanzania	Chesley et al., 1999	-5	35						0.65								92.1	92.5	0.114	0.015		1.98		H				1.94135	2.01631	1.83777	1.90966
LB-4	Labait, Tanzania	Chesley et al., 1999	-5	35						1.54						1340		91.1	91.3	0.1248	0.3198		0.34	1.73	GH				0.339226	1.7244	0.213772	1.14647
LB-12	Labait, Tanzania	Chesley et al., 1999	-5	35						1.98						1290		90	90.6	0.1249	0.4424		0.33		GH				0.32419	-2.91206	0.198528	-1.58127
LB-24	Labait, Tanzania	Chesley et al., 1999	-5	35						1.21						1268		92.2	92.4	0.1122	0.562		2.2		GH				2.20426	-5.66091	2.10421	-5.17132
LB-34	Labait, Tanzania	Chesley et al., 1999	-5	35						0.68						1115		89.8	89.9	0.1103	1.33		2.48		GH				2.48053	-1.08739	2.38418	-1.02663
LB-45	Labait, Tanzania	Chesley et al., 1999	-5	35						3.89						1406		89.2	90.2	0.1329	2.349			0.18	GH				-0.891066	0.179619	-1.03373	0.20519
LB-50	Labait, Tanzania	Chesley et al., 1999	-5	35						1.37						1359		91	91.2	0.1205	0.233		0.98	2.34	GH				0.98224	2.35067	0.865636	2.10892
LB-53	Labait, Tanzania	Chesley et al., 1999	-5	35						1.73						1298		90.8	91.1	0.1223	1.044		0.71		GH				0.713909	-0.442296	0.593624	-0.360339
KAT-17	Labait, Tanzania	Chesley et al., 1999	-5	35						0.41						1240		88	89	0.1247	1.165		0.36		GH				0.354258	-0.183949	0.229012	-0.11665
KAT-5	Labait, Tanzania	Chesley et al., 1999	-5	35														86.4		0.1194	0.621		1.15		D				1.14563	-2.08575	1.03126	-1.81259
KAT-12	Labait, Tanzania	Chesley et al., 1999	-5	35														85.9		0.1154	1.19		1.73		D				1.73606	-0.888357	1.62971	-0.818315
KAT-14	Labait, Tanzania	Chesley et al., 1999	-5	35														86.7		0.2537	0.457				D				-23.0624	68.1207	-23.5852	65.4143
LB-59	Labait, Tanzania	Chesley et al., 1999	-5	35														84.7		0.1287	1.897			0.06	D				-0.24999	0.0659901	-0.383639	0.0996514
Q1	Qixia	Gao et al., 2002 Rudnick et al., 2004	37	121						2.56	2.79			8.21	39.94			89.7	90.3	0.12672	0.1785		0.4	0.67	SL			Brandon et al., 2001 187Re/188Os = 0.433, 187Os/188Os = 0.1296	0.397914	0.675436	-0.0795953	-0.146099
Q4	Qixia	Gao et al., 2002 Rudnick et al., 2004	37	121						3.52	3.23			7.83	38.54			89.8	89.9	0.12992	0.3346		future	future	SL				-0.0443759	-0.195518	-0.571749	-3.99306
Q5	Qixia	Gao et al., 2002 Rudnick et al., 2004	37	121						1.61	1.08			7.83	43.63			90.9	91	0.12412	0.0805		0.75	0.93	SL				0.75489	0.92596	0.31733	0.39896
Q6	Qixia	Gao et al., 2002 Rudnick et al., 2004	37	121						1.02	0.54			7.87	45.15			91.1	91.9	0.12	0.0734		1.32	1.58	SL				1.31625	1.5814	0.940977	1.15542
		Gao et al., 2002 Rudnick et al., 2004								1.02	0.54			7.87	45.15			91.1	91.9	0.11992			1.33	1.33	SL				1.3271		0.953023
Q8	Qixia	Gao et al., 2002 Rudnick et al., 2004	37	121						1.44	1.95			7.64	42.23			90.8	91	0.1266	0.0167		0.41	0.43	SL				0.414437	0.431002	-0.0612178	-0.0639404
Q17	Qixia	Gao et al., 2002 Rudnick et al., 2004	37	121						3.4	2.98			8.35	38.36			89.1	89.5	0.12804	0.337		0.22	0.97	SL				0.215864	0.96755	-0.28212	-2.02744
		Gao et al., 2002 Rudnick et al., 2004								3.4	2.98			8.35	38.36			89.1	89.5	0.12863	0.4301		0.13	17.35	SL				0.134314	17.3196	-0.372864	3.74935
QX-07	Qixia	Gao et al., 2002 Rudnick et al., 2004	37	121						3.41	2.45			7.96	40.07			90	90.2	0.1257	0.2109		0.54	1.04	D				0.538212	1.04485	0.0764345	0.165128
		Gao et al., 2002 Rudnick et al., 2004								3.41	2.45			7.96	40.07			90	90.2	0.12539			0.58		D				0.580786		0.123775
QX-11	Qixia	Gao et al., 2002 Rudnick et al., 2004	37	121						2.99	2.52			8.12	40.8			90	90	0.1244	0.2547		0.72	1.73	D				0.716549	1.72552	0.27471	0.779544
QX-13	Qixia	Gao et al., 2002 Rudnick et al., 2004	37	121						3.09	2.53			7.95	39.99			90	90.3	0.12433	0.2662		0.73	1.87	D				0.726136	1.8671	0.285368	0.882896
QX-14	Qixia	Gao et al., 2002	37	121						2.17					42.2			91.1	90.4	0.12606	0.0455		0.49	0.55	D				0.488732	0.545859	0.0214115	0.0242193
DMP 04	Hannuoba	Gao et al., 2002 Rudnick et al., 2004	40	115	67.5	21.9		8.9	1.6	2.29	1.94			7.33	42.05			91.1	91.1	0.12353	0.2412		0.84	1.87	SL				0.835602	1.87017	0.407037	1.0507
		Gao et al., 2002 Rudnick et al., 2004			67.5	21.9		8.9	1.6	2.83	2.18			7.53	41.55			90.8	91.1	0.12314	0.2427		0.89	2	SL				0.888894	2.00378	0.466262	1.21457
DMP 19	Hannuoba	Gao et al., 2002 Rudnick et al., 2004	40	115	61.7	29.8		7.8	0.8	1.91	1.8			7.07	40.74			91.1	91.3	0.12026	0.1189		1.28	1.76	SL				1.28098	1.75884	0.901812	1.28967
DMP 23A	Hannuoba	Gao et al., 2002 Rudnick et al., 2004	40	115	64.5	27.1		6.3	2	2.32	1.64			7.77	41.25			90.4	91.1	0.11878	0.1043		1.48	1.94	SL				1.48147	1.94402	1.12441	1.52634
DMP 25	Hannuoba	Gao et al., 2002 Rudnick et al., 2004	40	115	70.3	24.2		3.8	1.5	1.61	1			7.11	43.88			91.7	91.6	0.11664	0.0476		1.77	1.99	SL				1.7702	1.98526	1.44483	1.64159
DMP 41	Hannuoba	Gao et al., 2002 Rudnick et al., 2004	40	115	57.5	30.9		9.6	1.9	2.76	2.12			7.74	40.15			90.2	90.4	0.12358	0.2599		0.83	2.05	SL				0.828766	2.05201	0.39944	1.17531
DMP 51	Hannuoba	Gao et al., 2002 Rudnick et al., 2004	40	115	64.4	27		7.6	0.9	1.96	1.89			7.41	41.97			91	91.1	0.12357	0.1903		0.83	1.47	SL				0.830133	1.4731	0.400959	0.776075
DMP 56	Hannuoba	Gao et al., 2002 Rudnick et al., 2004	40	115	54.9	27.7		15.3	2.1	3.49	3.21			7.97	38.15			89.5	89.9	0.12769	0.2947		0.26	0.82	SL				0.264189	0.823293	-0.228354	-0.922464
		Gao et al., 2002 Rudnick et al., 2004			54.9	27.7		15.3	2.1	3.73	3.03			7.84	38.47			89.7	89.9	0.12819	0.308		0.2	0.67	SL				0.195142	0.673281	-0.305178	-1.43221
DMP 58	Hannuoba	Gao et al., 2002 Rudnick et al., 2004	40	115	56.7	28.4		13	2	3.16	2.76			7.92	38.82			89.7	90.2	0.12591	0.2253		0.51	1.06	SL				0.509354	1.05703	0.0443439	0.104081
DMP 59	Hannuoba	Gao et al., 2002 Rudnick et al., 2004	40	115	63.5	23.6		11	1.9	2.58	2.43			7.99	40.38			90	90.4	0.12377	0.2387		0.8	1.78	SL				0.802783	1.77454	0.370562	0.941557
DMP 60	Hannuoba	Gao et al., 2002 Rudnick et al., 2004	40	115	44.7	37.4		16.1	1.8	3.67	3.47			7.48	36.68			89.7	90.1	0.12668	0.3359		0.4	1.78	SL				0.403422	1.77844	-0.0734688	-0.512117
		Gao et al., 2002 Rudnick et al., 2004			44.7	37.4		16.1	1.8	3.9	3.24			7.41	37.2			89.9	90.1	0.12644	0.345		0.44	2.11	SL				0.43646	2.11761	-0.0367232	-0.304691
DMP 67c	Hannuoba	Gao et al., 2002 Rudnick et al., 2004	40	115	55.7	27.8		12.9	3.2	3.78	2.88			8.39	37.81			88.9	89.5	0.12333	0.1026		0.86	1.13	SL				0.862937	1.1284	0.437416	0.591516
F50-9270	Fuxian	Gao et al., 2002	39.4912	121.746						0.96					30.4			89		0.11011	0.062		2.7	3.07	GP				2.64273	3.07325	2.41211	2.85414
F50-9270-R	Fuxian	Gao et al., 2002	39.4912	121.746						0.96					30.4			89		0.11136	0.0631		2.53	2.89	GP				2.47669	2.88916	2.22815	2.64582
F50-9271	Fuxian	Gao et al., 2002	39.4912	121.746						1.54					27.5			88.5		0.10919	0.0705		2.83	3.29	GP				2.76465	3.28785	2.54714	3.09086
SD 9405	Mengyin	Gao et al., 2002	35.7082	117.78						0.72					44.5			92.2		0.12216	0.48		1.46	future	P				1.0226	-10.3439	0.614825	-2.8341
L50-2003	Fuxian	Zhang et al., 2008	39.4912	121.746						2.21				6.03	29.2			90.6		0.11582	0.1756	0.11445	2.06	3.13	GL			Brandon et al., 2001 187Re/188Os = 0.433, 187Os/188Os = 0.1296	2.06424	3.13034	1.77097	2.80717
LN-9830	Fuxian	Zhang et al., 2008	39.4912	121.746						1.5				5.43	21.3			88.6		0.10878	0.2077	0.10716	3.03	5.31	GL				3.03279	5.3053	2.84403	5.40989
F50-9254	Fuxian	Zhang et al., 2008	39.4912	121.746						1.02				5.39	20.5			88.3		0.10717	0.0437	0.10683	3.08	3.36	SP				3.07626	3.3624	2.89215	3.1895
F50-9270	Fuxian	Zhang et al., 2008	39.4912	121.746						0.69				5.3	22.2			89.2		0.11015	0.0389	0.10984	2.68	2.89	P				2.67854	2.89158	2.45177	2.66522
F50-9274	Fuxian	Zhang et al., 2008	39.4912	121.746						0.67				7.7	22.4			85.2		0.10629	0.0265	0.10608	3.17	3.35	P				3.17496	3.3469	3.00138	3.18037
F50-9281	Fuxian	Zhang et al., 2008	39.4912	121.746						1.11				6.21	20.6			86.8		0.10793	0.0129	0.10783	2.94	3.02	SP				2.94442	3.019	2.7462	2.82229
F50-9229	Fuxian	Zhang et al., 2008	39.4912	121.746						16.8				10.9	18.1			76.7					2.28	0.19	D
L42-13	Fuxian	Zhang et al., 2008	39.4912	121.746																					Chromiteseparate
F50-01	Fuxian	Zhang et al., 2008	39.4912	121.746																0.11955	1.3969	0.10869	2.57	3.14	GL				2.83081	-0.629119	2.6204	-0.398693
SD-9804	Mengyin	Zhang et al., 2008	35.7082	117.78						0.67				7.05	38.1			91.5		0.11138	0.0939	0.11064	1.46	future	P				2.57239	3.14146	2.33418	2.90847
SL-2001	Mengyin	Zhang et al., 2008	35.7082	117.78						0.7				8.65	36.7			89.4		0.11041	0.0785	0.1098	2.68	3.16	GL				2.68384	3.16436	2.45764	2.94588
Sv1b-11	Mengyin	Zhang et al., 2008	35.7082	117.78						1.84				7.95	36.4			90.1		0.1097	5.2012	0.11353	2.19	2.99	GL				2.18734	-0.251033	1.90745	-0.206309
Sv1b-12	Mengyin	Zhang et al., 2008	35.7082	117.78						1.06				6.49	36.6			91.8		0.11462	0.1395	0.11057	2.58	3.28	SP				2.58168	2.98796	2.34448	2.68736
Sv1b-16	Mengyin	Zhang et al., 2008	35.7082	117.78						5.34				7.11	14.2			79.8		2.3745	0.133	0.15421	future	1.32	Px				-3.51231	#NUM!	-4.4452	#NUM!
FC6-1-2	Fangcheng	Zhang et al., 2008	34	117						2.81				9.15	24.1			83.7		3.5402	0.0675	0.132			Px				-0.333622	#NUM!	-0.893827	#NUM!
FC6-2-2	Fangcheng	Zhang et al., 2008	34	117						3.03				9.05	24.5			84.1		0.4865	0.4924	0.11959			Px				1.37183	116.873	1.00269	91.6392
FC25-2	Fangcheng	Zhang et al., 2008	34	117						2.11				6.56	20.2			85.8		0.0808	2.3601	0.15837			Px				-4.12687	-1.53957	-5.13439	-1.40114
YY-04	Yangyuan	Liu et al., 2010	39	115						1.63				8	44.39			91.7	92	0.11499			1.8		SP			Shirey and Walker, 1998, 187Re/188Os =0.40186, 187Os/188Os = 0.1270	1.7676		1.69072
YY-04R	Yangyuan	Liu et al., 2010	39	115																0.11516	0.076		1.8	2.1	SP				1.74294	2.14226	1.66543	2.05868
YY-08	Yangyuan	Liu et al., 2010	39	115						2.97				8.79	39.9			90	90.5	0.12605	0.13		0.15	0.21	SP				0.14173	0.209385	0.0229406	0.0343027
YY-09	Yangyuan	Liu et al., 2010	39	115						3.04				8.39	40.77			90.6	90.9	0.12163	0.15		0.81	1.3	SP				0.796781	1.26634	0.695017	1.12111
YY-11	Yangyuan	Liu et al., 2010	39	115						1.77				9.22	44.79			90.6	90.8	0.12116	0.1		0.88	1.2	SP				0.866017	1.15018	0.766042	1.0258
YY-13	Yangyuan	Liu et al., 2010	39	115						2.44				8.7	41.87			90.5	90.9	0.12102	0.17		0.9	1.5	SP				0.886625	1.52848	0.787182	1.38201
YY-13R	Yangyuan	Liu et al., 2010	39	115																0.12117	0.14		0.88	1.3	SP				0.864545	1.3217	0.764531	1.18444
YY-22	Yangyuan	Liu et al., 2010	39	115						2.45				8.25	42.26			91	91.2	0.12072	0.23		0.99	2.3	SP				0.930761	2.15424	0.832456	1.99202
YY-22R	Yangyuan	Liu et al., 2010	39	115																0.12063	0.2		0.98	1.88	SP				0.943996	1.86488	0.846032	1.71302
YY-26	Yangyuan	Liu et al., 2010	39	115						3.08				8.76	41.65			90.4	90.7	0.11891	0.462		1.2	-8.6	SP				1.19636	-8.67169	1.10489	-6.64121
YY-26R	Yangyuan	Liu et al., 2010	39	115																0.11966	0.647		1.1	-1.8	SP				1.08645	-1.8247	0.992155	-1.56201
YY-27	Yangyuan	Liu et al., 2010	39	115						2.87				9.49	41.16			89.6	90.2						SP
YY-27R	Yangyuan	Liu et al., 2010	39	115																0.11948	0.065		1.1	1.3	SP				1.11285	1.32523	1.01923	1.21954
YY-51	Yangyuan	Liu et al., 2010	39	115						1.12				8.54	46.02			91.4	91.6	0.11601	0.02		1.6	1.7	SP				1.61948	1.70311	1.53883	1.62037
YY-51R	Yangyuan	Liu et al., 2010	39	115																0.11639	0.01		1.6	1.6	SP				1.56421	1.6036	1.48215	1.52042
YY-52	Yangyuan	Liu et al., 2010	39	115						2.7				8.52	41.5			90.6	90.8	0.12345	0.2		0.54	1.1	SP				0.527919	1.04643	0.41919	0.851858
YY-58	Yangyuan	Liu et al., 2010	39	115						2.4				8.07	42.37			91.2	91.7	0.12122	0.23		0.87	2	SP				0.857183	1.98552	0.756979	1.81298
YY-60	Yangyuan	Liu et al., 2010	39	115						1.26				8.86	44.85			90.9	91.3	0.12079	0.24		0.94	2.3	SP				0.920466	2.25983	0.821895	2.09383
YYB-2	Yangyuan	Liu et al., 2010 Xu et al., 2008	39	115	64.5	31.4		1.8	0.9	1.45	0.9			9.03	42.75			0.9	91.8	0.11861	0.076		1.3	1.5	SP				1.24027	1.52589	1.14993	1.42289
YYB-2Ra	Yangyuan	Liu et al., 2010	39	115																0.1124			2.1	-	SP				2.14206		2.07467
YYB-4	Yangyuan	Liu et al., 2010 Xu et al., 2008	39	115	56.9	35		6.4	0.8	2.15	1.85			8.85	40.55		1079	90	91.9	0.12016	0.39		1	40	SP				1.01306	27.3321	0.916878	75.481
YYB-4Ra	Yangyuan	Liu et al., 2010	39	115																0.1146			1.8		SP				1.82413		1.74869
YYB-7	Yangyuan	Liu et al., 2010 Xu et al., 2008	39	115	71.5	25.7		0.6	0.2	2.37	2.87			9.16	40.55		1103	90	91.8	0.11525	0.15		1.7	2.7	SP				1.72988	2.73694	1.65204	2.65202
YYB-7Ra	Yangyuan	Liu et al., 2010	39	115																0.111			2.3		SP				2.3435		2.28119
YG-18	Yangyuan	Liu et al., 2010 Xu et al., 2008	39	115	81.9	13.6		2.5	1.6	1.2	0.73			9.43	46.12		942	90	90.6	0.11633	0.046		1.6	1.8	SP				1.57294	1.77329	1.4911	1.68636
YG-18Ra	Yangyuan	Liu et al., 2010	39	115																0.1106			2.4		SP				2.40093		2.34006
DMP 04b	Hannuoba	Liu et al., 2010 Rudnick et al., 2004	40	115						2.29				7.33	42.05			91.1	91.1	0.12289	0.271		0.63	1.9	SP				0.610774	1.85621	0.504195	1.61466
DMP 19b	Hannuoba	Liu et al., 2010 Rudnick et al., 2004	40	115						1.91				7.07	40.74			91.1	91.3	0.11998	0.211		1.1	2.2	SP				1.03949	2.1681	0.943989	2.02366
DMP 19R	Hannuoba	Liu et al., 2010 Rudnick et al., 2004	40	115																0.11996	0.216		1	2.2	SP				1.04243	2.23159	0.947	2.08661
DMP 25	Hannuoba	Liu et al., 2010 Rudnick et al., 2004	40	115						1.61				7.11	43.88			91.7	91.6	0.1166	0.045		1.5	1.7	SP				1.53364	1.72428	1.4508	1.63619
DMP25Rb	Hannuoba	Liu et al., 2010 Rudnick et al., 2004	40	115																0.11678	0.056		1.5	1.7	SP				1.50743	1.74798	1.42392	1.65771
DMP 41b	Hannuoba	Liu et al., 2010 Rudnick et al., 2004	40	115						2.76				7.74	40.15			90.2	90.4	0.12327	0.285		0.57	1.9	SP				0.554563	1.88594	0.446526	1.61559
DMP 51	Hannuoba	Liu et al., 2010 Rudnick et al., 2004	40	115						1.96				7.41	41.97			91	91.1	0.12309	0.208		0.59	1.2	SP				0.581196	1.19859	0.47385	1.00389
DMP 56b	Hannuoba	Liu et al., 2010 Rudnick et al., 2004	40	115						3.49				7.97	38.15			89.5	89.9	0.12748	0.35		-0.1	-0.6	SP				-0.0717383	-0.558151	-0.196117	-1.83996
DMP 58b	Hannuoba	Liu et al., 2010 Rudnick et al., 2004	40	115						3.16				7.92	38.82			89.7	90.2	0.12539	0.242		0.25	0.6	SP				0.239998	0.601497	0.123775	0.3224
DMP 60b	Hannuoba	Liu et al., 2010 Rudnick et al., 2004	40	115						3.67				7.48	36.68			89.7	90.1	0.12628	0.365		0.13	1.2	SP				0.107447	1.16117	-0.0122386	-0.175509
DMP 67c	Hannuoba	Liu et al., 2010 Rudnick et al., 2004	40	115						3.78				8.39	37.81			88.9	89.5	0.12242	0.1		0.69	0.91	SP				0.680225	0.90388	0.575446	0.770987
DA20-02	Hannuoba	Liu et al., 2010	40	115						3.12									90.1	0.12535	0.443		0.25	-2.5	SP				0.245948	-2.45699	0.129881	-1.01687
DA20-02Rc	Hannuoba	Liu et al., 2010	40	115																0.12551	0.461		0.24		SP				0.222143	-1.53165	0.105454	-0.606797
DA20-02Rd	Hannuoba	Liu et al., 2010	40	115																0.11867	0.229		1.2		SP				1.23149	2.82498	1.14092	2.70426
DA20-05	Hannuoba	Liu et al., 2010	40	115						2.71									91.1	0.12329	0.336		0.55	3.3	SP				0.551604	3.28945	0.44349	3.01973
DA20-05Rc	Hannuoba	Liu et al., 2010	40	115																0.1236	0.344		0.51	3.4	SP				0.505706	3.42742	0.396401	3.14081
DA20-05Rd	Hannuoba	Liu et al., 2010	40	115																0.11512	0.201		1.8		SP				1.74874	3.44914	1.67138	3.37789
DA20-16	Hannuoba	Liu et al., 2010	40	115						1.2									89.6	0.12377	0.073		0.48	0.59	SP				0.480522	0.586668	0.370562	0.454935
DA20-16Rd	Hannuoba	Liu et al., 2010	40	115																0.1227	0.098		0.64		SP				0.63886	0.843461	0.533009	0.709392
DA20-17	Hannuoba	Liu et al., 2010	40	115						2.4									90.5	0.12318	0.14		0.57	0.88	SP				0.567881	0.869302	0.46019	0.713933
DA20-17Rd	Hannuoba	Liu et al., 2010	40	115																0.11896	0.079		1.2		SP				1.18904	1.47644	1.09738	1.37087
DA20-19	Hannuoba	Liu et al., 2010	40	115						3.74									89.6	0.12701	0.271		0		SP				-0.00149367	-0.00458706	-0.124031	-0.401832
DA20-19Rc	Hannuoba	Liu et al., 2010	40	115																0.12715	0.279		0		SP				-0.022409	-0.0733282	-0.145494	-0.504965
MY9	Mengyin	Chu et al., 2009	35.7082	117.78						0.32				4.22	39.4		0.64	94.3319		0.11052	0.17	0.10921	2.6	4.05	H			Shirey and Walker, 1998, 187Re/188Os =0.40186, 187Os/188Os = 0.1270	2.60008	4.12155	2.54421	4.08939
MY9-R	Mengyin	Chu et al., 2009	35.7082	117.78																0.11039	0.055	0.10996	2.49	2.81	H				2.4927	2.80765	2.43414	2.74872
MY9*	Mengyin	Chu et al., 2009	35.7082	117.78																0.11056	0.02	0.1104	2.43	2.53	H				2.42962	2.5301	2.36948	2.46938
MY10*	Mengyin	Chu et al., 2009	35.7082	117.78						0.06				7.75	44.6		0.21	91.1176		0.11091	0.3	0.10886	2.65	6.44	D				2.65012	8.80321	2.5955	9.19146
MY33	Mengyin	Chu et al., 2009	35.7082	117.78						0.27				6.05	38.7		0.44	91.937		0.11662	0.03	0.11635	1.57	1.67	H				1.57003	1.65254	1.48812	1.56612
MY34	Mengyin	Chu et al., 2009	35.7082	117.78						0.79				3.96	39.3		0.46	94.6496		0.11043	0.073	0.10986	2.51	2.95	H				2.50703	2.95065	2.44883	2.89277
MY35	Mengyin	Chu et al., 2009	35.7082	117.78						8.67				8.08	28.9		2.72	86.4419		0.13195	0.29	0.12969	-0.4	-2.68	Px				-0.403144	-2.71673	-0.536241	-3.46882
PL01	Penglai	Chu et al., 2009	38	121	58.9	25.7		12.4	3.1	3.56				8.34	39.3	1005	2.61	89.3614	89.8	0.12544	0.1	0.12543	0.23	0.36	SL				0.234047	0.309403	0.117669	0.155811
PL02	Penglai	Chu et al., 2009	38	121	75.2	20.5		3.4	1	1.19				8.15	44.5	965	1.01	90.6828	90.8	0.11974	0.081	0.11974	1.08	1.34	SH				1.07471	1.34301	0.980117	1.23246
PL02*	Penglai	Chu et al., 2009	38	121																0.12103	0.03	0.12103	0.89	0.96	SL				0.885153	0.955998	0.785672	0.850252
PL03	Penglai	Chu et al., 2009	38	121	53.1	30.1		14.1	2.7	3.97				10.92	36.1	1094	2.79	85.4921	88.7	0.12677	0.21	0.12675	0.04	0.07	SL				0.0373298	0.0719131	-0.0841905	-0.187869
PL03-R	Penglai	Chu et al., 2009	38	121														#VALUE!		0.12588	0.23	0.12586	0.17	0.39	SL				0.170036	0.389903	0.0519861	0.118158
PL03*	Penglai	Chu et al., 2009	38	121																0.12618	2.19	0.12599	0.15	-0.03	SL				0.15067	-0.0275319	0.0321143	-0.000667828
PL06	Penglai	Chu et al., 2009	38	121	56.1	24.8		15.4	3.7	4.31				8.28	38.2	1012	3.27	89.1584	89.9	0.12608	0.23	0.12606	0.14	0.32	SL				0.14024	0.320463	0.0214115	0.0443363
PL07	Penglai	Chu et al., 2009	38	121	56	25.9		15.2	3	3.96				8.47	37.9	1113	3.08	88.8594	89.6	0.12697	1.05	0.12688	0.02	0	SL				0.0179212	-0.00277835	-0.104107	0.0702425
PL07*	Penglai	Chu et al., 2009	38	121																0.12722	0.2	0.1272	-0.03	-0.07	SL				-0.0298805	-0.0654537	-0.153162	-0.319061
PL08	Penglai	Chu et al., 2009	38	121	73.2	19.3		5.8	1.7	1.69				7.97	43.8	956	1.39	90.7374	91.3	0.12032	0.19	0.1203	0.99	1.83	L				0.992498	1.86335	0.895784	1.71893
PL08*	Penglai	Chu et al., 2009	38	121																0.1206	0.01	0.1206	0.95	0.98	L				0.948407	0.972414	0.850557	0.872639
PL10	Penglai	Chu et al., 2009	38	121						3.22				8.38	40.4		2.42	89.5764		0.12272	0.08	0.12271	0.64	0.79	L				0.637382	0.792921	0.531493	0.664945
PL11	Penglai	Chu et al., 2009	38	121						2.77				8.3	41.8		1.81	89.9771		0.12519	0.098	0.12518	0.27	0.36	L				0.271231	0.356484	0.155823	0.205572
PL11*	Penglai	Chu et al., 2009	38	121						1.85				8.15	43		1.56	90.389		0.12479	0.097	0.12478	0.33	0.43	L				0.330679	0.433558	0.21682	0.285824
PL12	Penglai	Chu et al., 2009	38	121																0.12072	0.11	0.12071	0.93	1.29					0.932232	1.27785	0.833965	1.15361
PL13	Penglai	Chu et al., 2009	38	121	59.2	24.5		12.8	3.4	3.89				8.52	39	935	2.84	89.0824	89.5	0.12885	0.1	0.12884	-0.28	-0.38	SL				-0.275464	-0.368999	-0.405196	-0.546473
PL14	Penglai	Chu et al., 2009	38	121	61.2	23.4		12.5	2.9	3.45				7.97	40	1012	2.81	89.9459	90.4	0.12754	0.13	0.12753	-0.08	-0.12	SL				-0.079216	-0.119345	-0.203791	-0.30731
PL14*	Penglai	Chu et al., 2009	38	121																0.12529	0.08	0.12529	0.26	0.32	SL				0.254873	0.318056	0.139038	0.174592
PL15	Penglai	Chu et al., 2009	38	121						2.46				8.45	41.2		1.98	89.6813		0.12136	0.098	0.12135	0.84	1.1	L				0.838037	1.1039	0.73734	0.978784
PL16	Penglai	Chu et al., 2009	38	121	58.2	24.5		14.4	2.9	3.83				10.79	37.2	1101	2.85	86.0052	88.1	0.12599	0.07	0.12598	0.15	0.18	SL				0.15216	0.182403	0.0336432	0.0390848
PL16-R	Penglai	Chu et al., 2009	38	121																0.12596	0.43	0.12592	0.16	-2.27	SL				0.161098	-2.2604	0.0428153	-0.38436
PL16*	Penglai	Chu et al., 2009	38	121																0.12588	0.046	0.12587	0.17	0.19	SL				0.168546	0.188617	0.0504577	0.0554238
PL17	Penglai	Chu et al., 2009	38	121	59.8	25.6		11.3	3.3	3.67				8.23	39.7	1014	2.59	89.5818	90.3	0.12592	0.1	0.12591	0.16	0.22	SL				0.162588	0.214372	0.0443439	0.057451
PL17*	Penglai	Chu et al., 2009	38	121																0.12546	0.11	0.12545	0.23	0.31	SL				0.231071	0.315884	0.114615	0.157081
PL18	Penglai	Chu et al., 2009	38	121	70.9	21.8		4.7	2.7	2.26				8.88	43	973	1.17	89.6176	90.7	0.11765	0.73	0.11759	1.39	-1.72	SH				1.38933	-1.73516	1.3028	-1.53974
PL18-R	Penglai	Chu et al., 2009	38	121																0.11672	0.16	0.1167	1.52	2.48	SH				1.51908	2.49853	1.43587	2.39986
PL18*	Penglai	Chu et al., 2009	38	121																0.11741	1.93	0.11725	1.44	-0.38	SH				1.43893	-0.377874	1.35367	-0.344124
PL19	Penglai	Chu et al., 2009	38	121	68	22.4		7.6	2	2.43				8.28	42.1	996	1.94	90.063	90.4	0.12711	0.23	0.12709	-0.01	-0.04	SL				-0.0134444	-0.038431	-0.136295	-0.337287
PL19*	Penglai	Chu et al., 2009	38	121																0.12533	0.14	0.12532	0.25	0.38	SL				0.250411	0.381585	0.13446	0.206542
PL19*-R	Penglai	Chu et al., 2009	38	121																0.12547	0.21	0.12546	0.23	0.47	SL				0.229583	0.476767	0.113089	0.239748
PL23	Penglai	Chu et al., 2009	38	121	64.2	30		3.7	2.1	1.87				7.97	42.5	855	1.19	90.4811	91.1	0.12029	0.049	0.12028	0.99	1.13	SH				0.995436	1.1307	0.898798	1.02424
PL23*	Penglai	Chu et al., 2009	38	121																0.12077	0.046	0.12077	0.92	1.04	SH				0.923408	1.04174	0.824913	0.933609
SW01	Shanwang	Chu et al., 2009	36	118						2.29				14.23	34.8		5.05	81.3407		0.13351	1.2	0.13319	-0.93	0.47	W				-0.931767	0.487598	-1.07887	0.540864
SW02	Shanwang	Chu et al., 2009	36	118	58.7	21		17.7	2.6	3.29				8.18	37.7	903	3.75	89.1485	90	0.12611	0.259	0.12605	0.14	0.37	SL				0.14173	0.372782	0.0229406	0.0404823
SW03	Shanwang	Chu et al., 2009	36	118	51.7	35.2		11	2.1	3.07				8.94	37.2	918	2.36	88.1196	89.9	0.12101	0.15	0.12097	0.89	1.41	SL				0.893983	1.41084	0.79473	1.2716
SW04	Shanwang	Chu et al., 2009	36	118	34.9	15.1		50	0.02	3.19				7.6	26	952	9.26	85.9118	90.3	0.12278	0.068	0.12276	0.63	0.75	SPx				0.629992	0.75395	0.523911	0.629493
SW05	Shanwang	Chu et al., 2009	36	118	63.7	23		11.2	2.2	2.7				9.51	38.8	970	2.64	87.9119	86.1	0.1352	0.6	0.13503	-1.21	2.12	SL				-1.21155	2.43406	-1.36612	2.54737
SW06	Shanwang	Chu et al., 2009	36	118	60.8	27.1		10.4	1.8	2.93				8.42	39.9	1013	2.38	89.4145	89.6	0.12416	0.18	0.12411	0.43	0.78	SL				0.430121	0.763483	0.318851	0.573751
SW07	Shanwang	Chu et al., 2009	36	118	76.6	17.8		4.8	0.8	1.21				8.13	44.1	1075	1.09	90.6271	90.7	0.12219	1.44	0.12181	0.77	-0.28	SH				0.770244	-0.278755	0.667794	-0.230201
SW07*	Shanwang	Chu et al., 2009	36	118																0.1223	0.041	0.12229	0.7	0.78	SH				0.699421	0.776732	0.595138	0.662505
SW08	Shanwang	Chu et al., 2009	36	118	60.7	22.1		14.4	2.7	3.46				8.88	38.6	1004	3.02	88.5693	89	0.12739	0.34	0.12729	-0.04	-0.41	SL				-0.0433316	-0.379623	-0.166965	-1.37886
SW09	Shanwang	Chu et al., 2009	36	118	72.8	17.7		7.6	1.9	1.79				8.13	42.9	1088	1.62	90.3902	90.9	0.12171	0.16	0.12167	0.79	1.28	SL				0.790885	1.2987	0.688968	1.14861
SW09*	Shanwang	Chu et al., 2009	36	118																0.12209	0.058	0.12208	0.73	0.85	SL				0.730416	0.851025	0.626936	0.733238
SW10	Shanwang	Chu et al., 2009	36	118	62.6	22.3		12.2	2.9	3.08				8.05	40	892	2.62	89.8553	90.2	0.12395	0.331	0.12386	0.47	2.51	SL				0.467185	2.52953	0.356878	2.16023
SW11*	Shanwang	Chu et al., 2009	36	118	64.9	20.8		12.8	1.5	2.22				7.95	40.5	963	2.78	90.0802	90.8	0.12131	0.159	0.12127	0.85	1.39	SL				0.84982	1.39009	0.749426	1.24458
SW12	Shanwang	Chu et al., 2009	36	118	56.7	25.2		15.2	2.9	3.58				8.54	38	888	3.31	88.8039	89.3	0.12979	0.589	0.12964	-0.39	0.89	SL				-0.395626	0.88827	-0.528524	1.08618
SW13	Shanwang	Chu et al., 2009	36	118	65	22.1		10.3	2.6	2.7				7.86	41.2	839	2.31	90.3322	90.6	0.12292	0.343	0.12283	0.62	4.02	SL				0.619645	4.02282	0.513296	3.85867
SW14	Shanwang	Chu et al., 2009	36	118	61.5	21.4		14.3	2.8	3.4				8.59	39.2	1115	2.83	89.0525	90	0.12515	0.326	0.12506	0.29	1.44	SL				0.289072	1.44624	0.174129	0.941748
SW15	Shanwang	Chu et al., 2009	36	118	61.5	23.7		13.3	1.5	2.39				7.69	40.2	1001	2.84	90.3085	90.9	0.12138	0.265	0.12131	0.84	2.41	SL				0.843929	2.41555	0.743383	2.22902
SW16	Shanwang	Chu et al., 2009	36	118	66.3	22.7		9.6	1.5	2.05				7.79	41.9	1005	2.09	90.5551	91	0.11996	0.146	0.11992	1.05	1.63	SL				1.0483	1.62925	0.953023	1.50116
SW17	Shanwang	Chu et al., 2009	36	118												1046			89.9	0.12325	0.154	0.12321	0.56	0.9					0.563442	0.901332	0.455636	0.738189
SW18	Shanwang	Chu et al., 2009	36	118	57.8	26.2		13.3	2.7	3.53				8.51	39	926	2.74	89.0938	90.6	0.12501	0.414	0.1249	0.31	-11.06	SL				0.312851	-10.7462	0.198528	-3.40146
SW18*	Shanwang	Chu et al., 2009	36	118	71.6	16.2		10.4	1.8	1.94				8.17	42.5		2.25	90.2654		0.12527	0.398	0.12516	0.27	20.71	SL				0.274205	22.2276	0.158875	-10.9008
SW19	Shanwang	Chu et al., 2009	36	118	60.3	16.1		22.3	1.3	2.85				9.06	36.8	1056	4.35	87.8645	89.2	0.125	0.16	0.12496	0.3	0.49	SL				0.303935	0.494312	0.189379	0.309137
SW20	Shanwang	Chu et al., 2009	36	118	73.1	15.8		9.2	2	2.13				8.08	42.8	956	1.99	90.4234	90.7	0.11965	0.234	0.11959	1.1	2.57	SL				1.09672	2.57233	1.00269	2.43211
SW21	Shanwang	Chu et al., 2009	36	118	63.5	3		29.9	3.6	3.75				14.3	32.7		5.73	80.3	81.8	0.1265	1.64	0.12606	0.14	-0.02	SW				0.14024	-0.0242445	0.0214115	0.0144317
SW22	Shanwang	Chu et al., 2009	36	118	61.3	25.7		11	2.1	2.89				8.67	39.8	1024	2.38	89.1101	89.8	0.12255	0.21	0.12249	0.67	1.39	SL				0.669886	1.3763	0.564839	1.18928
DHS	Dahongshan (SC)	Zhang et al., 2008	30	115						2.66				8.14	40.9			90.9		0.12404	0.3641	0.12205	1.04	4.66	GL				0.734843	4.52995	0.631477	4.41492
NY-G1	Ningyuan (SC)	Zhang et al., 2008	25	115						3.63				9.26	37.3			88.9		0.12553	0.328	0.12476	0.67	2.28	SL				0.33365	1.1829	0.219868	0.621247
NY-G2	Ningyuan (SC)	Zhang et al., 2008	25	115						3.55				9.34	35.1			88.1		0.12519	1.1991	0.12238	0.99	future	SL				0.686132	-0.136429	0.581506	-0.075198
NY-G3	Ningyuan (SC)	Zhang et al., 2008	25	115						3.24				9.53	36.6			88.4		0.12311	0.2928	0.12242	0.99	2.72	SL				0.680225	2.10366	0.575446	1.83389
NY-G4	Ningyuan (SC)	Zhang et al., 2008	25	115						3.09				9.66	36.9			88.3		0.12367	0.3295	0.1229	0.92	3.34	SL				0.609296	2.70062	0.502678	2.36703
TYS01-3	Ningyuan (SC)	Liu et al., 2012	25	115						2.06				9.19	37.41			89	88	0.12116	0.18	0.12064	1.26	2.05	SL			Miesel et al., 2001, 187Re/188Os = 0.43464, 187Os/188Os =0.1296	1.26704	2.07458	0.844524	1.40766
TYS02-2	Ningyuan (SC)	Liu et al., 2012	25	115						3.1				8.81	36.03			89	89	0.12551	0.35	0.12451	0.72	3.28	SL				0.723061	3.40848	0.257958	0.968943
TYS02-3	Ningyuan (SC)	Liu et al., 2012	25	115						3.26				8.81	34.89			89	89	0.12573	0.38	0.12466	0.7	4.63	SL				0.701877	5.54329	0.235107	2.23305
TYS03-2	Ningyuan (SC)	Liu et al., 2012	25	115						2.8				8.87	35.31			89	90	0.12372	0.29	0.12291	0.94	2.5	SL				0.948562	2.65532	0.501161	1.43638
TYS03-8	Ningyuan (SC)	Liu et al., 2012	25	115						3.1				10.17	35.02			87	89	0.12424	0.4	0.12311	0.91	10.43	SL				0.920421	14.2522	0.470815	-17.903
TYS03-16	Ningyuan (SC)	Liu et al., 2012	25	115						3.33				9.18	34.27			88	90	0.12565	0.32	0.12473	0.69	2.34	SL				0.691989	2.32532	0.22444	0.45426
TYS03-16-R	Ningyuan (SC)	Liu et al., 2012	25	115						3.33				9.15	34.19			88							SL
TYS03-19	Ningyuan (SC)	Liu et al., 2012	25	115						4.01				8.7	33.61			89	89	0.12929	0.51	0.12783	0.25	-0.21	SL				0.252427	-0.207106	-0.249855	1.5568
TYS03-23	Ningyuan (SC)	Liu et al., 2012	25	115						3.6				9.84	32.72			87	89	0.1272	0.36	0.12619	0.48	2.14	SL				0.48537	2.35418	0.00152964	-1.88178
TYS04-4	Ningyuan (SC)	Liu et al., 2012	25	115						3.45				8.58	34.82			89	89	0.1249	0.29	0.12406	0.78	2.13	SL				0.786569	2.13179	0.326459	0.757227
TYS05-2	Ningyuan (SC)	Liu et al., 2012	25	115						3				8.58	34.38			89	91	0.1216	0.24	0.12092	1.22	2.59	SL				1.22785	2.61015	0.802277	1.78494
TYS05-2-R	Ningyuan (SC)	Liu et al., 2012	25	115						2.96				8.56	34.39			89							SL
TYS06	Ningyuan (SC)	Liu et al., 2012	25	115						3.72				9	33.22			88	89	0.12775	0.35	0.12675	0.4	1.58	SL				0.40593	1.56575	-0.0841905	-2.23539
TYS07	Ningyuan (SC)	Liu et al., 2012	25	115						1.72				8.69	38.01			90	91	0.11681	0.1	0.11653	1.82	2.32	SH				1.83942	2.35238	1.46125	1.89728
TYS08	Ningyuan (SC)	Liu et al., 2012	25	115						4.09				9.03	33.51			88	89	0.1265	0.37	0.12545	0.58	3.24	SL				0.590183	3.61068	0.114615	-0.809325
TYS08-R	Ningyuan (SC)	Liu et al., 2012	25	115						4.08				9.01	33.6			88							SL
474521	Nunaa Kangerlussuaq (Off Craton)	Witting et al., 2010 Sand et al., 2009	66.7704	-51.1956	86.6	10.6		2.7	0.06	0.28			7.96		48.13			91.5096	91.72	0.11407	0.699	0.10762	1.99	-3.214	SH	H	S	Walker, 1989, 187Os/188Os =12757,. Pearson, 1995a, 187Re/188Os = 0.3972	2.70372	-3.12635	2.77688	-2.42298
474527	Nunaa Kangerlussuaq (Off Craton)	Witting et al., 2010 Sand et al., 2009	66.7704	-51.1956	82.5	10.9	5.84	0.81		0.82			7.14		46.93			92.1361	91.96	0.11287	0.083	0.11193	2.217	2.745	GH	H	G		2.12984	2.4695	2.14408	2.53188
464006	Nunaa Kangerlussuaq (Off Craton)	Witting et al., 2010	66.7704	-51.1956	87.9	5.4		6.7	0.02	0.89			7.29		48.8			92.2675		0.11114	0.15	0.10968	2.435	3.72	SL	L	S		2.43011	3.38738	2.47526	3.61795
483806	Nunaa Kangerlussuaq (Off Craton)	Witting et al., 2010	66.7704	-51.1956	85.3	8.7	2.98	3		0.49			8.5		46.76			90.7459	91	0.11171	0.158	0.11018	2.356	3.711	GH	H	G		2.36351	3.3656	2.40182	3.60036
477421	Nunaa Kangerlussuaq (Off Craton)	Witting et al., 2010 Sand et al., 2009	66.4125	-51.8194	95.2	0		4.8		0.13			7.66		48.88			91.919	91.72	0.10977	0.025	0.10953	2.62	2.778	D	D			2.45008	2.56318	2.49727	2.62596
474535	Sarfartup Nunaa P-Dyke (Off Craton)	Witting et al., 2010	66.353	-51.4632	81.6	12.3	5.61	0.5		0.81			9.6		47.29			89.7759		0.12478	0.175	0.12308	0.552	0.935	GH	H	G		0.619215	0.645612	0.475368	0.390786
474536	Sarfartup Nunaa P-Dyke (Off Craton)	Witting et al., 2010	66.353	-51.4632	85	6	1.61	7.4		0.1			6.54		49.67			93.1215		0.1078	0.117	0.10666	2.886	3.951	GL	L	G		2.83081	3.64251	2.91693	3.88203
474537	Sarfartup Nunaa P-Dyke (Off Craton)	Witting et al., 2010	66.353	-51.4632	85.1	9.6	5.32	0		1.21			6.78		48.23			92.6902		0.1112	0.049	0.11072	2.426	2.735	GH	H	G		2.2915	2.5058	2.32241	2.56625
474538	Sarfartup Nunaa P-Dyke (Off Craton)	Witting et al., 2010	66.353	-51.4632	80.2	8.7	8.74	2.4		1.8			8.38		45.39			90.6148		0.1086	0.216	0.10663	2.761	5.485	GH	H	G		2.83477	5.03045	2.9213	5.70852
474541	Sarfartup Nunaa P-Dyke (Off Craton)	Witting et al., 2010	66.353	-51.4632																0.10985	0.103	0.10884	2.61	3.428	W	W			2.54183	3.13955	2.59843	3.2988
474542	Sarfartup Nunaa P-Dyke (Off Craton)	Witting et al., 2010	66.353	-51.4632	84.76	5.4	8.83	1		1.46			7.08		47.49			92.2819		0.11098	0.126	0.10975	2.456	3.469	GH	H	G		2.42079	3.15904	2.46498	3.33492
474543	Sarfartup Nunaa P-Dyke (Off Craton)	Witting et al., 2010	66.353	-51.4632	75.3	12.1	12.49	0.1		1.05			8.8		45.08			90.1297		0.11536	0.078	0.11461	1.858	2.268	GH	H	G		1.7702	2.02978	1.7472	2.03465
474544	Sarfartup Nunaa P-Dyke (Off Craton)	Witting et al., 2010 Sand et al., 2009	66.353	-51.4632	92.8	1.5		2.7	-3	0.21			8.84		48.77			90.77	92.74	0.11284	0.189	0.111	2.202	3.92	D	D			2.25413	3.51842	2.28119	3.8185
474545	Sarfartup Nunaa P-Dyke (Off Craton)	Witting et al., 2010 Sand et al., 2009	66.353	-51.4632	81	13.3	4.33	1.3	0	1.07			6.4		47.71			93.0012	92.74	0.10817	0.031	0.10787	2.836	3.051	GH	H	G		2.67058	2.82896	2.74036	2.92225
474546	Sarfartup Nunaa P-Dyke (Off Craton)	Witting et al., 2010	66.353	-51.4632	82.9	9.8	3.12	4.2		0.89			6.93		48.33			92.5548		0.10844	0.031	0.10813	2.8	3.018	GH	H	G		2.6361	2.79049	2.70235	2.87953
474547	Sarfartup Nunaa P-Dyke (Off Craton)	Witting et al., 2010 Sand et al., 2009	66.353	-51.4632	81	13.9	5.02	0.01		0.51			6.91		48.68			92.6241	92.64	0.10978	0.053	0.10927	2.618	2.985	GH	H	G		2.48467	2.74628	2.53541	2.83587
474551	Sarfartup Nunaa P-Dyke (Off Craton)	Witting et al., 2010	66.353	-51.4632	83.8	4.5	4.27	7.4		0.51			7.33		49.04			92.2635		0.10788	0.177	0.10616	2.876	4.845	GW	W	G		2.89689	4.44776	2.98974	4.89958
474555	Sarfartup Nunaa P-Dyke (Off Craton)	Witting et al., 2010 Sand et al., 2009	66.353	-51.4632	78	15.9	3.78	2.3		0.7			7.97		45.93			91.1289	91.19	0.11588	0.198	0.1138	1.808	3.348	GH	H	G		1.87912	2.91398	1.86743	3.10476
474557	Sarfartup Nunaa P-Dyke (Off Craton)	Witting et al., 2010	66.353	-51.4632	89.3	9.1		1.6		0.54			7.45		46.08			91.6843		0.11845	1.565	0.10305	1.46	-0.552	H	H			3.30629	-0.485544	3.44065	-0.39803
474566	Sarfartup Nunaa P-Dyke (Off Craton)	Witting et al., 2010 Sand et al., 2009	66.353	-51.4632	79.4	13.5	4.2	2.9		0.81			6.91		48.01			92.5289	92.64	0.10851	0.025	0.10827	2.79	2.961	GH	H	G		2.61752	2.74054	2.68187	2.82268
474573	Sarfartup Nunaa P-Dyke (Off Craton)	Witting et al., 2010	66.353	-51.4632	87.7	8.2		3.6	0.51	1			9.19		47.32			90.1753		0.12482	0.126	0.1236	0.546	0.775	SH	H	S		0.547828	0.53528	0.396401	0.310133
474574	Sarfartup Nunaa P-Dyke (Off Craton)	Witting et al., 2010	66.353	-51.4632	85.5	10.2	2.9	1.4		0.65			6.61		48.49			92.8959	92.7	0.10842	0.015	0.10828	2.802	2.899	GH	H	G		2.6162	2.68877	2.68041	2.76325
474575	Sarfartup Nunaa P-Dyke (Off Craton)	Witting et al., 2010 Sand et al., 2009	66.353	-51.4632	82.2	10.8	5.86	1.1		1.55			8.28		46.1			90.8463	90.16	0.12167	0.136	0.12035	0.987	1.445	GH	H	G		0.992609	1.18071	0.888249	1.05123
474576	Sarfartup Nunaa P-Dyke (Off Craton)	Witting et al., 2010	66.353	-51.4632	95.4	0	3.6	1		0.12			10.3		48.08			89.2713		0.10788	0.222	0.10572	2.876	5.872	GD	D	G		2.95498	5.35514	3.05374	6.1294
474577	Sarfartup Nunaa P-Dyke (Off Craton)	Witting et al., 2010 Sand et al., 2009	66.353	-51.4632	71.6	21.1	5.11	2.2		1.01			7.37		44.77			91.5457	91.49	0.11634	0.108	0.11529	1.723	2.304	GH	H	G		1.67861	2.03903	1.64608	2.04574
488802	Kissvissat Qooruat Francois (On Craton)	Witting et al., 2010	66.4754	-50.9483	93.3	5		1.6	0.15	0.11			8.36		49.91			91.4103		0.10888	0.233	0.10662	2.741	5.908	SD	D	S		2.83609	5.36242	2.92275	6.19146
488836	Kissvissat Qooruat Francois (On Craton)	Witting et al., 2010 Sand et al., 2009	66.4754	-50.9483	94.7	1		4.3		0.2			9.44		48.05			90.0726	91.03	0.11047	0.209	0.10844	2.525	4.881	D	D			2.59496	4.41571	2.657	4.93927
488850	Kissvissat Qooruat Francois (On Craton)	Witting et al., 2010	66.4754	-50.9483	98.9	0		0.8	0.24	0.14			7.05		50.71			92.765	93.1	0.10676	0.148	0.10532	3.027	4.582	SD	D	S		3.00774	4.23018	3.11186	4.59404
488858	Kissvissat Qooruat Francois (On Craton)	Witting et al., 2010	66.4754	-50.9483	89.8	8.5		1.7	0.05	0.29			12.75		44.71			86.2083		0.12811	0.881	0.11152	1.208	-1.144	SH	H	S		2.18466	0.0723068	2.20456	0.234184
488866	Kissvissat Qooruat Francois (On Craton)	Witting et al., 2010 Sand et al., 2009	66.4754	-50.9483	86.7	9.6		1.7	1.9	0.32			15.01		43.4			83.7505	86.14	0.11331	0.027615	0.113043	2.138	2.284	SH	H	S		1.98074	2.07514	1.97957	2.08439
488869	Kissvissat Qooruat Francois (On Craton)	Witting et al., 2010 Sand et al., 2009	66.4754	-50.9483	93.5	4.9		1.6		0.46			7.65		48.83			91.9211	87.66	0.11041	0.072	0.10952	2.559	3.07	D	D			2.45141	2.78748	2.49874	2.88753
488890	Kissvissat Qooruat Francois (On Craton)	Witting et al., 2010 Sand et al., 2009	66.4754	-50.9483	91.4	5.1		1.6	1.8	0.25			10.87		46.08			88.313	89.14	0.12504	6.8	0.05929	0.516	-0.035	SD	D	S		8.78914	-0.023856	9.4504	-0.0108674
488882	Kissvissat Qooruat Francois (On Craton)	Witting et al., 2010	66.4754	-50.9483	99	0		1		0.7			8.08		46.82			91.1731		0.11391	2.624	0.08844	2.056	-0.405	D	D			5.19308	-0.375397	5.51474	-0.331481
488883	Kissvissat Qooruat Francois (On Craton)	Witting et al., 2010 Sand et al., 2009	66.4754	-50.9483	99.1	0		0.9		0.06			6.83		50.81			92.9877	93.01	0.11066	0.451	0.10531	2.631	-73.902	D	D			3.00906	-168.319	3.11331	-18.4958
488892	Kissvissat Qooruat Francois (On Craton)	Witting et al., 2010 Sand et al., 2009	66.4754	-50.9483	85.6	12.3	0.86	1.2		0.41			8.71		48.68			90.878	90.47	0.10839	0.027	0.10813	2.806	2.992	GH	H	G		2.6361	2.77068	2.70235	2.85657
474568	Atanaligaarsui Qooruat Hardy and Anna (OnCraton)	Witting et al., 2010 Sand et al., 2009	66.3883	-50.7145	74.5	13.1	7.95	4.4		1.3			8.96		44.09			89.7661	90.7	0.11126	0.073	0.11056	2.418	2.905	GH	H	G		2.31285	2.65962	2.34595	2.74395
474570	Atanaligaarsui Qooruat Hardy and Anna (OnCraton)	Witting et al., 2010	66.3883	-50.7145	83.5	10		6.2	0.27	0.09			10.83		47.35			88.6279		0.11647	0.216	0.11437	1.706	3.43	SL	L	S		1.80249	2.9944	1.78285	3.22276
484842b	Manitsoq Sillisissannguirt Ta. (OnCraton)	Witting et al., 2010	65.3	-51.6452																0.11104	0.055	0.1105	2.447	2.807					2.32085	2.56909	2.35477	2.63815
491731	Manitsoq Majuagaa (OnCraton)	Witting et al., 2010	65.225	-51.9749																0.11381	0.138	0.11246	2.071	3.048					2.05888	2.73643	2.0658	2.85438
477406	Manitsoq Majuagaa (OnCraton)	Witting et al., 2010 Sand et al., 2009	65.225	-51.9749						1.45			11.73		43.25			86.7942	92.48	0.11923	0.956	0.10995	1.325	1.942					2.39416	-0.964884	2.43561	-0.746941
G-06-?A	South Pyramidefjeld (On Craton)	Witting et al., 2010	61.4243	-48.2779	87.7	9.8		2.5		0.41			8.97		47.5			90.4208		0.11203	0.132	0.11167	2.313	3.33	H	H			2.16461	3.02157	2.18244	3.18051
G-06-4A	South Pyramidefjeld (On Craton)	Witting et al., 2010	61.4243	-48.2779	98.2	1.5			0.3	0.25			8.22		49.2			91.4304		0.11148	0.06	0.11132	2.388	2.769	SD	D	S		2.21139	2.53495	2.23404	2.60093
G-06-4B	South Pyramidefjeld (On Craton)	Witting et al., 2010	61.4243	-48.2779	95.7	1.5		2.8		0.45			8.25		47.1			91.0528		0.12297	0.107	0.12268	0.805	1.075	D	D			0.67407	0.841045	0.536041	0.675503
G-06-4C	South Pyramidefjeld (On Craton)	Witting et al., 2010	61.4243	-48.2779	92.8	1.5		5.7		0.57			8.01		47			91.2735		0.11665	0.481	0.11533	1.681	-14.258	D	D			1.67321	-15.4936	1.64013	-6.84582
G-06-4D	South Pyramidefjeld (On Craton)	Witting et al., 2010	61.4243	-48.2779	94.8	0		5.2		0.39			9.02		46.8			90.2426		0.12183	0.815	0.1196	0.964	-1.066	D	D			1.09478	-0.908776	1.00118	-0.623925
G-06-6A	South Pyramidefjeld (On Craton)	Witting et al., 2010	61.4243	-48.2779	99.4	0		0.6		0.26			9.52		48.1			90.0063		0.11213	0.165	0.11168	2.299	3.719	D	D			2.16327	3.36215	2.18097	3.60352
G-06-6B	South Pyramidefjeld (On Craton)	Witting et al., 2010	61.4243	-48.2779	95.6	1.4		2.6	0.4	0.45			8.5		46.7			90.7351		0.11665	0.481	0.11534	1.68	-14.209	SD	D	S		1.67187	-15.4936	1.63864	-6.84582
G-06-6C	South Pyramidefjeld (On Craton)	Witting et al., 2010	61.4243	-48.2779	99.9				0.1	0.05			8.76		50.2			91.0834		0.1154	0.195	0.11487	1.852	3.384	SD	D	S		1.7352	2.9934	1.70856	3.1973
G-06-7A	South Pyramidefjeld (On Craton)	Witting et al., 2010	61.4243	-48.2779	95.9	1.5		2.6	0.1	0.5			8.34		47.4			91.016		0.11509	0.278	0.11433	1.896	5.325	SD	D	S		1.80787	4.64819	1.78879	5.56329
G-06-7B	South Pyramidefjeld (On Craton)	Witting et al., 2010	61.4243	-48.2779	95.5	1.6		2.9		0.34			10		46.2			89.172		0.11144	0.247	0.11076	2.393	5.571	D	D			2.28617	4.99186	2.31652	5.80341
G-06-7C	South Pyramidefjeld (On Craton)	Witting et al., 2010	61.4243	-48.2779	92.8	1.5		2.7	3	0.12			10.8		47.7			88.7297		0.11732	1.551	0.11308	1.589	-0.609	SD	D	S		1.97578	-0.552848	1.9741	-0.461821
G-06-7D	South Pyramidefjeld (On Craton)	Witting et al., 2010	61.4243	-48.2779	99.9				0.1	0.08			8.32		50.5			91.5394		0.1148	0.093	0.11454	1.935	2.471	SD	D	S		1.77962	2.21313	1.7576	2.24305
G-06-12A	South Pyramidefjeld (On Craton)	Witting et al., 2010	61.4243	-48.2779	98.2	1.7			0.1	0.04			16.5		43.8			82.5535		0.12581	0.136	0.12543	0.408	0.6	SD	D	S		0.295924	0.354648	0.117669	0.0912308
G-06-14A	South Pyramidefjeld (On Craton)	Witting et al., 2010	61.4243	-48.2779	98.1	1.5			0.4	0.2			9.03		48.9			90.6129		0.11013	0.102	0.10985	2.571	3.359	SD	D	S		2.40748	3.08209	2.4503	3.23293
G-06-14B	South Pyramidefjeld (On Craton)	Witting et al., 2010	61.4243	-48.2779	95.7	1.5		2.7	0.1	1.29			8		45.7			91.0576		0.11533	0.252	0.11464	1.862	4.482	SD	D	S		1.76616	3.92773	1.74275	4.47604
G-06-18A	South Pyramidefjeld (On Craton)	Witting et al., 2010	61.4243	-48.2779	93.5	5.8		0.7		0.17			8		48.3			91.4981		0.11455	0.252	0.11386	1.969	2.385	D	D			1.87106	4.16952	1.85853	4.78475
39670	South Pyramidefjeld (On Craton)	Witting et al., 2010	61.4243	-48.2779																0.11624	0.323	0.1131	1.738	6.994					1.9731	5.88438	1.97114	8.04968
126739	South Pyramidefjeld (On Craton)	Witting et al., 2010	61.4243	-48.2779																0.11359	0.083	0.11278	2.1	2.601					2.01601	2.35089	2.01849	2.39782
126740	South Pyramidefjeld (On Craton)	Witting et al., 2010	61.4243	-48.2779																0.11273	0.062	0.11213	2.218	2.588					2.10307	2.35418	2.11455	2.39854
126742	South Pyramidefjeld (On Craton)	Witting et al., 2010	61.4243	-48.2779																0.113733	0.224	0.11156	2.081	4.331					2.17932	3.84792	2.19866	4.28691
488850		Witting et al., 2010																	93.1										Just olivine analysis	Just olivine analysis	Just olivine analysis	Just olivine analysis
488850		Witting et al., 2010																	93.1	0.10732	0.179	0.1066							Just olivine analysis	Just olivine analysis	Just olivine analysis	Just olivine analysis
474557		Witting et al., 2010																		0.11022	0.242	0.10787							Just olivine analysis	Just olivine analysis	Just olivine analysis	Just olivine analysis
474576		Witting et al., 2010																		0.10719	0.098	0.10624							Just olivine analysis	Just olivine analysis	Just olivine analysis	Just olivine analysis
474574		Witting et al., 2010																	92.7	0.10871	0.042	0.1083							Just olivine analysis	Just olivine analysis	Just olivine analysis	Just olivine analysis
483606		Witting et al., 2010																	91	0.10995	0.038	0.10958							Just olivine analysis	Just olivine analysis	Just olivine analysis	Just olivine analysis
G-06-6C		Witting et al., 2010																		0.11027	0.029	0.11019							Just olivine analysis	Just olivine analysis	Just olivine analysis	Just olivine analysis
G-06-14A		Witting et al., 2010																		0.10814	0.036	0.10804							Just olivine analysis	Just olivine analysis	Just olivine analysis	Just olivine analysis
G-06-12A		Witting et al., 2010																		0.12585	0.039	0.12579							Just olivine analysis	Just olivine analysis	Just olivine analysis	Just olivine analysis
G-06-?A		Witting et al., 2010																		0.11014	0.273	0.1094							Just olivine analysis	Just olivine analysis	Just olivine analysis	Just olivine analysis
23673		Witting et al., 2010																		0.11044	0.026	0.11034							Just olivine analysis	Just olivine analysis	Just olivine analysis	Just olivine analysis
14.4/38.70	Karelian Craton, Finland	Peltonen and Brügmann, 2006	23	66	80	17			3	0.61	0.39		8.46		46.6		70	90.7567	91.55	0.1203	0.118	0.11911	1.34	1.63	SH			187Re/188Os and, 187Os/188Os not specified in paper, so assumed Walker, 1989, 187Re/188Os = 0.3972, 187Os/188Os = 0.12757	1.26503	1.54294	1.07485	1.27692
14.7./66.65	Karelian Craton, Finland	Peltonen and Brügmann, 2006	23	66	88	11		0.1		0.22	0.19		8.53		47.26		70	90.8055	92.25	0.11206	0.189	0.11016	2.57	4.09	SH				2.57493	4.31281	2.40476	4.03411
9.2./24.37b	Karelian Craton, Finland	Peltonen and Brügmann, 2006	23	66	76.8	19	3	0.5	0.5	0.77	0.34		8.28		46.69	750	92	90.9515	91.82	0.12003	0.408	0.11593	1.78	25.82	GSH				1.73373	-71.8979	1.55076	-30.2146
14.4/30.55	Karelian Craton, Finland	Peltonen and Brügmann, 2006	23	66	82	10	8			0.83	0.46		9.2		45.5	775	96	89.8123	91.23	0.11483	0.072	0.11412	2.03	2.31	GSH				1.99888	2.3066	1.81996	2.09314
9.2./31.46	Karelian Craton, Finland	Peltonen and Brügmann, 2006	23	66	67.8	20.6	6.1	4.4		1	0.92		8.52		44.05	784	98	90.2115	91.91						GSH
Lu5-15-8/84.10b	Karelian Craton, Finland	Peltonen and Brügmann, 2006	23	66	71.7	22.4	5.8		1	1.28	0.51		8.34		45.23	811	103	90.6254	91.694	0.11804	0.141	0.11663	1.68	2.21	GSH				1.63087	2.19222	1.44632	1.91732
14.7/44.48	Karelian Craton, Finland	Peltonen and Brügmann, 2006	23	66	79	15.4	3.2	1.2		0.26	0.63		9.07		44.12	814	104	89.6597	91.7						GSH
R18-38.45B	Karelian Craton, Finland	Peltonen and Brügmann, 2006	23	66	85	7.8	5.4	1.8	1	1.09	0.77		7.99		42.8	861	113	90.52	91.967	0.11163	0.126	0.11036	2.54	3.34	GSH				2.54597	3.42817	2.37536	3.19622
Lu5-15-4/37.80	Karelian Craton, Finland	Peltonen and Brügmann, 2006	23	66	94.1	3.6	1.7		1	0.25	0.15		7.02		40.7	914	123	91.1775	92.611	0.11269	0.532	0.10734	2.95	-9.61	GSH				2.98181	-7.02085	2.81776	-6.10956
14.01/11.5	Karelian Craton, Finland	Peltonen and Brügmann, 2006	23	66	60.7	32.4	3.2	3.6		0.84	1.01		7.59		41.42	909	122	90.6783	92.35						GH
R18-40.50	Karelian Craton, Finland	Peltonen and Brügmann, 2006	23	66	85.4	4.1	3.3	7		1.08	2.97		10		37	946	130	86.8341	87.726						GL
R18-33.45	Karelian Craton, Finland	Peltonen and Brügmann, 2006	23	66	84.3	6.4	1.9	7.2		0.83	0.97		8.29		42.1	1030	147	90.0522	91.053	0.11296	0.145	0.1115	2.38	3.29	GL				2.38062	3.38021	2.20751	3.12927
R18-38.45A	Karelian Craton, Finland	Peltonen and Brügmann, 2006	23	66	66.2	10.4	14.8	8.4		2.22	2.13		8.6		38.2	1042	150	88.7864	90.678	0.12666	0.362	0.12303	0.8	1.93	GL				0.682184	1.53204	0.482955	-0.9152
R18-37.05	Karelian Craton, Finland	Peltonen and Brügmann, 2006	23	66	80.4	16.2	3.2			0.44	0.34		7.39		41.2	1100	163	90.8574	92.318	0.11223	0.183	0.11039	2.54	3.96	GH				2.54163	4.15169	2.37095	3.87655
Lu5-15-2/35.95	Karelian Craton, Finland	Peltonen and Brügmann, 2006	23	66	68.2	11.2	12.8	7.6		3.55	2.8		6.94		38	1108	164	90.7066	92.673	0.14229	1.155	0.13068	-0.28	1.11	GL				-0.471826	1.15477	-0.689231	1.25326
5.8./84.85	Karelian Craton, Finland	Peltonen and Brügmann, 2006	23	66	57.4	25.2	7.7	9.6		2.29	1.55		8.85		39.87	1281	206	88.9264	90.82	0.11994	0.469	0.11523	1.88	-13.08	GL				1.83641	-6.74362	1.65501	-5.11743
5.8./74	Karelian Craton, Finland	Peltonen and Brügmann, 2006	23	66	68.6	23.5	7.9			1.15	0.72		8.77		42.42	1389	234	89.6072	90.82	0.1178	0.046	0.11734	1.59	1.7	GH				1.52636	1.647	1.34021	1.43818
R18-45.65	Karelian Craton, Finland	Peltonen and Brügmann, 2006	23	66	98				2	0.17	0.05		9.16		46.8		< 120	90.1061	91.247						D
Ju11-8-7/34.15	Karelian Craton, Finland	Peltonen and Brügmann, 2006	23	66	90.5	4.3		1.7	1	0.62	0.51		8.34		44.8		< 120	90.544	91.688						D
Obn 41-13	Obnazhennaya, Siberia	Ionov et al., 2015a	70.25	121.58	69.8	27.3		2.2	0.7	0.82	0.7							91.9	92.3	0.112638	0.016	0.1126	2.3	2.38	SH	Low-CaAl dunites and harzburgites		Miesel et al., 2001 and Backer et al.,2006 187Os/188Os =0.1296 and 187Re/188Os =0.435.	2.30109	2.382	2.0451	2.12466
Obn 59-13	Obnazhennaya, Siberia	Ionov et al., 2015a	70.25	121.58	98.2			1.5	0.4	0.14	0.38							91.5	91.6	0.117449	0.002	0.11744	1.65	1.66	SD	Low-CaAl dunites and harzburgites			1.65489	1.66121	1.32525	1.33061
Obn 60-13	Obnazhennaya, Siberia	Ionov et al., 2015a	70.25	121.58	94.4			2.2	3.3	0.93	0.63							88.8	89.2	0.121234	0.128	0.12089	1.19	1.61	SD	Low-CaAl dunites and harzburgites			1.18999	1.61381	0.806805	1.11692
Obn 69-13	Obnazhennaya, Siberia	Ionov et al., 2015a	70.25	121.58	74.8	23.8		0.7	0.7	0.76	0.33							91.8	92.1	0.117158	0.096	0.1169	1.73	2.16	SH	Low-CaAl dunites and harzburgites			1.72733	2.16354	1.40599	1.80372
Obn 01-13	Obnazhennaya, Siberia	Ionov et al., 2015a	70.25	121.58	57.2	35.8		5.5	1.6	1.68	1.4							91.7	91.6	0.115093	0.082	0.11487	2	2.41	SL	Ca-rich peridotites with moderate Al			1.99888	2.41743	1.70856	2.1103
Obn 08-13	Obnazhennaya, Siberia	Ionov et al., 2015a	70.25	121.58	79.2	5.6	2.8	12	0.4	1.2	2.77							91.9	92.1	0.116657	0.166	0.11621	1.82	2.82	GSL	Ca-rich peridotites with moderate Al			1.81977	2.82074	1.50901	2.47821
Obn 12-13	Obnazhennaya, Siberia	Ionov et al., 2015a	70.25	121.58						1.63	2.44							92	92.1	0.114826	0.071	0.11464	2.03	2.38	SL	Ca-rich peridotites with moderate Al			2.02957	2.38811	1.74275	2.08746
Obn 22-13	Obnazhennaya, Siberia	Ionov et al., 2015a	70.25	121.58						1.82	2.2							91.7	92	0.110096	0.121	0.10977	2.67	3.61	SL	Ca-rich peridotites with moderate Al			2.67573	3.61716	2.46205	3.45997
Obn 24-13	Obnazhennaya, Siberia	Ionov et al., 2015a	70.25	121.58						0.41	2.44							91.8	92	0.108486	0.073	0.10829	2.87	3.4	H	Ca-rich peridotites with moderate Al			2.87073	3.40266	2.67895	3.23991
Obn 37-13	Obnazhennaya, Siberia	Ionov et al., 2015a	70.25	121.58	85.2	3.9		10.5	0.4	0.57	2.48							91.5	91.8	0.110624	0.091	0.11038	2.59	3.22	SL	Ca-rich peridotites with moderate Al			2.59518	3.22299	2.37242	3.02448
Obn 39-13	Obnazhennaya, Siberia	Ionov et al., 2015a	70.25	121.58	75.4	5.6	4.8	13.1	1.2	1.9	3.17							91.8	92	0.11404	0.229	0.11343	2.19	4.37	GSL	Ca-rich peridotites with moderate Al			2.19077	4.37078	1.92227	4.3085
Obn 53-13	Obnazhennaya, Siberia	Ionov et al., 2015a	70.25	121.58						1.42	3.22							91.9	92.4	0.109939	0.306	0.10912	2.76	8.52	GSH	Ca-rich peridotites with moderate Al			2.76145	8.51477	2.5574	10.3508
Obn 68-13	Obnazhennaya, Siberia	Ionov et al., 2015a	70.25	121.58	84	2.5		12.4	1.2	0.88	2.94							90.9	91.2	0.11614	0.101	0.11587	1.86	2.37	SW	Ca-rich peridotites with moderate Al			1.86527	2.37146	1.5597	2.03724
O-1017	Obnazhennaya, Siberia	Ionov et al., 2015a	70.25	121.58						1.1	2.5							91.7	92.3	0.108784	0.083	0.10856	2.83	3.44	SH	Ca-rich peridotites with moderate Al			2.8352	3.44861	2.63944	3.28706
O-1061	Obnazhennaya, Siberia	Ionov et al., 2015a	70.25	121.58						0.82	1.95							91.6	91.9	0.108579	0.133	0.10822	2.88	4.04	SH	Ca-rich peridotites with moderate Al			2.87994	4.03903	2.68919	3.9449
Obn 06-13	Obnazhennaya, Siberia	Ionov et al., 2015a	70.25	121.58	68.7	5.7		21.7	4	3.25	4.86							92.4	92.4	0.118214	0.222	0.11762	1.63	3.13	SL	Ca, Al-rich lherzolites			1.63072	3.12579	1.29831	2.74917
Obn 20-13	Obnazhennaya, Siberia	Ionov et al., 2015a	70.25	121.58	60.2	21.5		14.5	3.8	3.22	3.24							92	92.3	0.119953	0.075	0.11975	1.34	1.59	SL	Ca, Al-rich lherzolites			1.344	1.5873	0.978612	1.1699
Obn 21-13	Obnazhennaya, Siberia	Ionov et al., 2015a	70.25	121.58	44.7	7	29.8	17.4	1.1	7.98	5.49							90	92.2	0.199333	1.857	0.19438		2.87	GSL	Ca, Al-rich lherzolites			-9.67879	2.8736	-11.4561	2.9248
O-47	Obnazhennaya, Siberia	Ionov et al., 2015a	70.25	121.58						2.66	3.76							90.9	90.8	0.117913	0.615	0.11627	1.81	-4.04	SL	Ca, Al-rich lherzolites			1.81174	-4.0295	1.50006	-2.27724
Uv-105/03	Udachnaya, Dyaldin, Siberia	Ionov et al, 2015b Doucet et al., 2012	66.45	112.25	86.4	12.8			0.8	0.67			6.65			881		92.8	92.8	0.11909	0.704	0.1149	2	-2.39	SH				1.99488	-2.39222	1.7041	-1.38548
Uv-402/09	Udachnaya, Dyaldin, Siberia	Ionov et al, 2015b Doucet et al., 2012	66.45	112.25	89.3	10.3			0.4	0.13			7.22			762		92.3	92.9	0.11869	0.208	0.1174	1.65	2.81	SH				1.66026	2.81767	1.33123	2.39611
Uv-487/09	Udachnaya, Dyaldin, Siberia	Ionov et al, 2015b Doucet et al., 2012	66.45	112.25	82.8	15.3				0.19			7.38			818		91.9	92.1	0.11632	0.287	0.1146	2.03	5.13	SH				2.03491	5.15785	1.74869	5.37823
Uv-590/09	Udachnaya, Dyaldin, Siberia	Ionov et al, 2015b Doucet et al., 2012	66.45	112.25	83.9	15.4			0.7	0.4			7.04			830		92.4	92.3	0.11194	2.24	0.0985	4.15	-0.59	SH				4.14491	-0.590163	4.0943	-0.46507
Uv-KC-137/08	Udachnaya, Dyaldin, Siberia	Ionov et al, 2015b Doucet et al., 2012	66.45	112.25	93.3	6.3			0.4	0.09			7.16			771		92.5	92.5	0.13151	2.509	0.1164	1.79	0.06	SH				1.79433	0.0552522	1.48066	0.150396
Uv-KC-150/08	Udachnaya, Dyaldin, Siberia	Ionov et al, 2015b Doucet et al., 2012	66.45	112.25	87.6	12			0.4	0.36			7.21			904		92.3	92.2	0.12312	0.627	0.1194	1.4	-2.06	SH				1.39121	-2.06079	1.03126	-0.793258
Uv-90/03	Udachnaya, Dyaldin, Siberia	Ionov et al, 2015b Doucet et al., 2012	66.45	112.25	51.9	42.6		4.9	0.6	1.67			5.61			845		93	92.9	0.29789	24.3	0.1517	-3.1	0.42	SH				-3.12969	0.421789	-4.03316	0.429516
Uv-90/03(R)	Udachnaya, Dyaldin, Siberia	Ionov et al, 2015b Doucet et al., 2012	66.45	112.25	51.9	42.6		4.9	0.6	1.67			5.61			845		93	92.9	0.83829	91.02	0.2907	-28	0.47	SH				-27.7661	0.467769	-32.6155	0.469785
Uv-101/03	Udachnaya, Dyaldin, Siberia	Ionov et al, 2015b Doucet et al., 2012	66.45	112.25	76.4	20.2		1.9	1.5	1.56			6.32			851		92.9	92.9	0.15053	6.728	0.1101	2.64	0.2	SH				2.63217	0.199304	2.41358	0.230063
Uv-101/03(R)	Udachnaya, Dyaldin, Siberia	Ionov et al, 2015b Doucet et al., 2012	66.45	112.25	76.4	20.2		1.9	1.5	1.56			6.32			851		92.9	92.9	0.15129	5.729	0.1168	1.74	0.25	SH				1.74074	0.245421	1.42093	0.281541
Uv-107/03	Udachnaya, Dyaldin, Siberia	Ionov et al, 2015b Doucet et al., 2012	66.45	112.25	86.2	11.1		2	0.7	0.55			6.99			939		92.4	92.3	0.11825	0.857	0.1131	2.23	-1.64	SH				2.23465	-1.6365	1.97114	-1.03599
Uv-454/09	Udachnaya, Dyaldin, Siberia	Ionov et al, 2015b Doucet et al., 2012	66.45	112.25	75.2	22.2		1.6	1	1.22			6.57			818		92.6	92.6	0.13885	0.82	0.1339	-0.6	1.43	SH				-0.596293	1.42508	-1.18955	1.74997
Uv-504/09	Udachnaya, Dyaldin, Siberia	Ionov et al, 2015b Doucet et al., 2012	66.45	112.25	86.9	9.7		3.3	0.1	0.16			7.48			839		91.9	92.1	0.1153	0.126	0.1145	2.04	2.72	SH				2.04824	2.71545	1.76354	2.40702
Uv-585/09(2)	Udachnaya, Dyaldin, Siberia	Ionov et al, 2015b Doucet et al., 2012	66.45	112.25	61.4	35		3	0.6	1.19			6.45			832		92.4	92.3	0.11491	0.293	0.1131	2.23	5.9	SH				2.23465	5.9089	1.97114	6.45747
Uv-600/09	Udachnaya, Dyaldin, Siberia	Ionov et al, 2015b Doucet et al., 2012	66.45	112.25	86.2	10.5		2.5	0.8	0.57			6.73			912		92.7	92.8	0.19162	5.095	0.161	-4.5	0.79	SH				-4.4971	0.793591	-5.57423	0.829266
Uv-02/03	Udachnaya, Dyaldin, Siberia	Ionov et al., 2015b	66.45	112.25	80.2	15.9	3.9			0.76			6.86			848	4.5	92.4	92.5	0.11903	4.829	0.09	5.23	-0.14	GH				5.22967	-0.144565	5.29666	-0.0970834
Uv-419/09	Udachnaya, Dyaldin, Siberia	Ionov et al., 2015b	66.45	112.25	69.4	21.5	4.6	4.5		1			6.62			931	5	92.2	92.2	0.11725	0.534	0.114	2.11	-8	GH				2.11489	-7.99777	1.83777	-3.91909
Uv-566/09	Udachnaya, Dyaldin, Siberia	Ionov et al., 2015b	66.45	112.25	84.5	13.6	1.9			0.35			7.11			888	3.8	92.3		0.15914	6.918	0.1175	1.64	0.27	GH				1.64683	0.27288	1.31627	0.302228
Uv-604/09	Udachnaya, Dyaldin, Siberia	Ionov et al., 2015b	66.45	112.25	84.6	10.7	4.7			0.92			7			939	3.5	92.3		0.20469	14.306	0.1186	1.49	0.32	GH				1.49897	0.324061	1.15143	0.337659
Uv-01/03	Udachnaya, Dyaldin, Siberia	Ionov et al., 2015 Doucet et al., 2013	66.45	112.25	62.6	33	4.4			0.7			7			1251	6.2	91.9	91.7	0.12286	0.734	0.1184	1.52	-1.37	GP				1.52589	-1.36853	1.18143	-0.589774
Uv-01/03(R)	Udachnaya, Dyaldin, Siberia	Ionov et al., 2015 Doucet et al., 2013	66.45	112.25	62.6	33	4.4			0.7			7			1251	6.2	91.9	91.7	0.12384	0.998	0.1178	1.6	-0.62	GP				1.60654	-0.617263	1.27136	-0.234368
Uv-408/09,	Udachnaya, Dyaldin, Siberia	Ionov et al., 2015 Doucet et al., 2013	66.45	112.25	67.4	22	6.4	4.2		1.35			7.79			1300	6.3	90.8	90.8	0.12293	0.04	0.1227	0.94	1	GP				0.944633	1.00511	0.533009	0.554408
Uv-421/09	Udachnaya, Dyaldin, Siberia	Ionov et al., 2015 Doucet et al., 2013	66.45	112.25	70.9	20.8	4.8	3.5		1.06			7.95			1256	5.6	90.7	90.8	0.11711	0.005	0.1171	1.7	1.72	GP				1.70051	1.71865	1.3761	1.39214
Uv-573/09	Udachnaya, Dyaldin, Siberia	Ionov et al., 2015 Doucet et al., 2013	66.45	112.25	69.6	17.4	7.4	5.6		1.59			7.49			1283	6	91.1	91.1	0.12422	0.61	0.1205	1.24	-1.87	GP				1.24272	-1.87427	0.865636	-0.548674
Uv-KC-03/08	Udachnaya, Dyaldin, Siberia	Ionov et al., 2015 Doucet et al., 2013	66.45	112.25	83.2	9.4	3.3	4.1		0.83			7.92			1294	6.3	91.2	91	0.1192	0.681	0.1151	1.97	-2.6	GP				1.96818	-2.5928	1.67436	-1.47383
Uv-KC-67/08	Udachnaya, Dyaldin, Siberia	Ionov et al., 2015 Doucet et al., 2013	66.45	112.25	68.7	23.3	4.1	3.9		0.87			7.23			1286	6.2	91.5	91.2	0.12312	0.702	0.1189	1.46	-1.48	GP				1.45859	-1.47473	1.10639	-0.600128
U57	Udachnaya, Dyaldin, Siberia	Ionov et al., 2015 Doucet et al., 2013	66.45	112.25	85.2	8.5	2.3	4		0.44			7.9			1291	6.5	91.3	91.1	0.11924	0.087	0.1187	1.48	1.76	GP				1.48552	1.76084	1.13642	1.35258
U183	Udachnaya, Dyaldin, Siberia	Ionov et al., 2015 Ionovet al., 2010	66.45	112.25	80.8	13.5	3.8	1.9		0.77			7.28			1198	6.3	91.9	91.6	0.13018	2.141	0.1173	1.67	0.02	GP				1.67368	0.0204033	1.34619	0.136466
U503	Udachnaya, Dyaldin, Siberia	Ionov et al., 2015 Doucet et al., 2013	66.45	112.25	75.2	14	7.1	3.7		1.12			7.65			1283	6.4	91.2	91.2	0.1175	0.198	0.1163	1.8	2.98	GP				1.80772	2.98885	1.49558	2.62789
U532	Udachnaya, Dyaldin, Siberia	Ionov et al., 2015 Doucet et al., 2013	66.45	112.25	86.4	5.7	3	4.9		0.55			8.02			1277	5.8	91.1	91	0.11822	0.05	0.1179	1.59	1.75	GP				1.59311	1.7485	1.25638	1.38287
U85	Udachnaya, Dyaldin, Siberia	Ionov et al., 2015	66.45	112.25	57	11.9	16.6	14.5		3.96			7.91			1240	5.5	89.6		0.12518	0.427	0.1226	1	26.56	GP				0.958214	26.4026	0.548168	-1.7961
U267	Udachnaya, Dyaldin, Siberia	Ionov et al., 2015	66.45	112.25	53.3	21.6	13	12.1		3.17			7.93			1221	5.4	89.6		0.12922	0.804	0.1244	0.7	-0.06	GP				0.713274	-0.0618452	0.27471	0.438802
2017-08-07	Jericho	Irvine, 2001 Kopylova et al., 2000	65	-111	68.8708	28.0773	0.406918	2.64496	0	0.64	0.6	0.51		5.35	45.74			93.3493		0.10679	0.0117	0.10676	3.02618	3.10566	GSH	H	GS	Miesel 1996, 187Re/188Os = 0.4243, 187Os/188Os = 0.1287	3.02618	3.10566	2.90235	2.98486
2017-09-12	Jericho	Irvine, 2001 Kopylova et al., 2000	65	-111	82.5177	16.0011	0	1.37291	0.10824	1.86	1.82	2.09		5.69	42.97			91.0052		0.1066	0.0125	0.10656	3.05308	3.13783	GSH	H	GS		3.05308	3.13783	2.93149	3.01955
2017-10-11	Jericho	Irvine, 2001 Kopylova et al., 2000	65	-111	77.8778	15.6048	2.4241	3.87241	0.220909	1.22	0.96	1.04		5.82	46.02			92.3911		0.10798	0.0483	0.10784	2.88073	3.21978	GSH	H	GS		2.88073	3.21978	2.74474	3.09697
10-12A	Jericho	Irvine, 2001 Kopylova et al., 2000	65	-111	69.8325	22.7	4.61788	2.7787	0.1	1.26	0.92	0.97		5.82	44.74			92.2576		0.10742	0.0561	0.10726	2.95889	3.37252	GSH	H	GS		2.95889	3.37252	2.82944	3.26167
10-12B	Jericho	Irvine, 2001 Kopylova et al., 2000	65	-111	69.9219	27.4854	0	2.44298	0.149748	0.54	0.55	0.98		5.43	46.19			92.8799		0.10839	0.0092	0.10836	2.81058	2.86727	GSH	H	GS		2.81058	2.86727	2.66871	2.72685
2017-11-18	Jericho	Irvine, 2001 Kopylova et al., 2000	65	-111	88.7295	8.60656	0	1.94672	0.717213	0.41	0.25	0.91		5.31	48.12			93.3313		0.10872	0.0108	0.10869	2.76601	2.83242	GSH	H	GS		2.76601	2.83242	2.6204	2.68841
23-9	Jericho	Irvine, 2001 Kopylova et al., 2000	65	-111	65.1843	33.8508	0	0.861387	0.103505	0.68	0.29	0.91		5.17	45.47			93.1195		0.10759	0.0203	0.10754	2.92117	3.05721	GSH	H	GS		2.92117	3.05721	2.78856	2.92935
39-23	Jericho	Irvine, 2001 Kopylova et al., 2000	65	-111	81.5476	12.307	0	3.85166	2.29371	1.3	0.93	1.38		5.53	47.07			92.5319		0.1189	0.265	0.11814	1.47559	3.5835	GSH	H	GS		1.47559	3.5835	1.22042	3.34444
44-12	Jericho	Irvine, 2001 Kopylova et al., 2000	65	-111	71.2247	25.7933	0	0.832466	2.1496	1.13	0.27	2.17		4.96	45.94			92.2158		0.11077	0.1502	0.11034	2.54269	3.80333	GSH	H	GS		2.54269	3.80333	2.3783	3.70712
9-l2	Jericho	Irvine, 2001 Kopylova et al., 2000	65	-111	82.5177	16.0011	0	1.37291	0.10824	0.35	0.36	1.25		5.4	47.91	304	3.28	92.9022		0.11987	0.1328	0.11949	1.28896	1.79123	GSH	H	GS		1.28896	1.79123	1.01773	1.44605
10-456'	Jericho	Irvine, 2001 Kopylova et al., 2000	65	-111	71.0394	27.7497	0	0	1.2109	0.97	1.78	1.35		6.06	43.2			91.3684		0.11861	0.0804	0.11838	1.44246	1.73576	GH	H	G		1.44246	1.73576	1.18443	1.44272
2017-11-22	Jericho	Irvine, 2001 Kopylova et al., 2000	65	-111	65.353	21.5475	5.8257	7.27383	0	1.64	1.81	1.37		6.17	42.05			91.0116		0.12462	0.0052	0.1246	0.577226	0.581517	GSL	L	GS		0.577226	0.581517	0.244249	0.244434
13-2	Jericho	Irvine, 2001 Kopylova et al., 2000	65	-111	74.6269	13.4328	6.76617	5.17413	0	0.49	0.82	2.27		6.16	45.79			90.8683		0.13055	4.3138	0.11821	1.46593	0.028543	GSL	L	GS		1.46593	0.028543	1.20992	0.0665476
21-1	Jericho	Irvine, 2001 Kopylova et al., 2000	65	-111	62.2558	33.5739	2.19019	1.56141	0.418682	0.67	0.55	1.3		5.56	44.15	811	3.08	92.1224	92.1	0.11467	0.041	0.11455	1.96909	2.15781	GSH	H	GS		1.96909	2.15781	1.75612	1.93786
22-1	Jericho	Irvine ,2001	65	-111						0.84	0.6	7.82			44.67	690	2.67	91.8806		0.11002	0.0689	0.10982	2.61316	3.07478					2.61316	3.07478	2.45471	2.92946
22-4	Jericho	Irvine, 2001 Kopylova et al., 2000	65	-111	63.5331	25.9328	6.16228	3.75928	0.612564	1.43	1.22	1.12		6.05	43.28	833	3.6	91.6184	91.7	0.11468	0.1599	0.11422	2.01425	3.1013	GSL	L	GS		2.01425	3.1013	1.80512	2.90276
25-4	Jericho	Irvine ,2001	65	-111						1.03	0.98	8.37			44.63	975	4.77	91.3518		0.113	0.0746	0.11278	2.21092	2.63607					2.21092	2.63607	2.01849	2.44274
26-11	Jericho	Irvine ,2001	65	-111						0.95	0.68	7.88			44.75	944	4.27	91.8368		0.11503	0.0419	0.11491	1.91978	2.10827					1.91978	2.10827	1.70261	1.88304
28-15	Jericho	Irvine, 2001 Kopylova et al., 2000	65	-111	61.8841	28.3156	7.06725	1.82311	0.909942	1.53	0.86	2		5.51	43.05			91.303		0.11736	0.0507	0.11722	1.60245	1.79482	GSL	L	GS		1.60245	1.79482	1.35816	1.53311
41-4	Jericho	Irvine, 2001 Kopylova et al., 2000	65	-111	72.4373	21.7836	2.967	2.14106	0.671002	0.73	0.68	1.48		5.89	45.35	648	2.52	91.7991	92	0.11389	0.043	0.11377	2.07578	2.28724	GSH	H	GS		2.07578	2.28724	1.87188	2.07835
51-2	Jericho	Irvine, 2001 Kopylova et al., 2000	65	-111	65.2	11.0643	16.9	6.82965	0	5.77	2.54	3.22		6.3	37.23			87.8279		0.11772	0.1059	0.11742	1.57489	2.03503	GSL	L	GS		1.57489	2.03503	1.32824	1.75084
53-10	Jericho	Irvine, 2001 Kopylova et al., 2000	65	-111	78.3894	20.999	0	0	0.611621	0.7	0.81	3.34		5.74	45.76			90.3168		0.10819	0.0809	0.10796	2.86455	3.48203	GH	H	G		2.86455	3.48203	2.7272	3.37379
21-3	Jericho	Irvine, 2001 Kopylova et al., 2000	65	-111	81.2188	8.59141	0.799201	9.39061	0	1.57	1.54	2.17		6.14	43.65	1088	5.12	90.5791	90.9	0.11309	0.0799	0.11286	2.20001	2.66075	GSH	H	GS		2.20001	2.66075	2.00665	2.46674
21-2	Jericho	Irvine, 2001 Kopylova et al., 2000	65	-111	80.6551	16.2743	3.07062	0	0	0.83	0.48	1.98		6.45	46.49	1335	5.77	90.9644	90.2	0.11222	0.1786	0.11171	2.35663	3.89676	GH	H	G		2.35663	3.89676	2.17654	3.80188
23-1	Jericho	Irvine, 2001 Kopylova et al., 2000	65	-111	80.259	14.7278	2.47167	2.54157	0	0.84	0.67	1.79		6.24	45.66			91.2029		0.12255	2.1157	0.1165	1.70154	-0.218648	GSH	H	GS		1.70154	-0.218648	1.46573	-0.127267
26-9	Jericho	Irvine, 2001 Kopylova et al., 2000	65	-111	82.0926	0	7.14286	10.7646	0	2.58	3.2	2.41		7.34	39.95			88.2205		0.1157	0.1127	0.11538	1.85535	2.45338	SL	L	S		1.85535	2.45338	1.63269	2.21205
39-3	Jericho	Irvine, 2001 Kopylova et al., 2000	65	-111	72.7548	20.0807	5.24723	1.91726	0	1.38	1.51	1.71		5.93	44.85			91.4561		0.11542	0.135	0.11503	1.90334	2.69397	GSL	L	GS		1.90334	2.69397	1.68477	2.46261
40-9	Jericho	Irvine, 2001 Kopylova et al., 2000	65	-111	82.3087	12.4092	3.4029	1.8792	0	0.73	0.58	1.66		6.95	45.95	1297	5.6	90.6546	90.5	0.12042	0.1965	0.11986	1.23771	2.14302	GSH	H	GS		1.23771	2.14302	0.962056	1.74538
40-20	Jericho	Irvine, 2001 Kopylova et al., 2000	65	-111	73.0337	20.6333	4.69867	1.63432	0	1.2	1.22	3.02		5.6	40.55			89.6805		0.11039	0.1026	0.1101	2.57523	3.32266	GSH	H	GS		2.57523	3.32266	2.41358	3.1884
40-21	Jericho	Irvine, 2001 Kopylova et al., 2000	65	-111	80.984	11.6647	4.96773	2.38356	0	0.93	0.75	1.73		6.99	45.36	1273	5.47	90.4402	90.3	0.11837	0.0668	0.11818	1.47007	1.70981	GSH	H	GS		1.47007	1.70981	1.21442	1.42637
PH1	Panda	Heaman and Pearson,2010	64	-110															92.5	0.10633	0.0259	0.10476	3.1		H			Miesel, (2001) and Backer,(2006) 187Os/188Os =0.1296 and 187Re/188Os =0.435.	3.33329	3.32065	3.19314	3.16908
PH2	Panda	Heaman and Pearson,2010	64	-110															92.5	0.10802	0.0647	0.10411	2.9		H				3.41807	3.39989	3.28734	3.2409
PH15	Panda	Heaman and Pearson,2010	64	-110															92.9	0.10913	0.0122	0.10839	2.8		H				2.85757	2.83792	2.66432	2.63618
PH16	Panda	Heaman and Pearson,2010	64	-110															92.9	0.1089	0.0205	0.10766	2.8		H				2.95355	2.92513	2.77104	2.72919
PH17	Panda	Heaman and Pearson,2010	64	-110																0.10857	0.023	0.10718	2.8		H				3.01657	2.98821	2.84111	2.79845
PH18	Panda	Heaman and Pearson,2010	64	-110															92.6	0.11012	0.037	0.10789	2.6		H				2.92332	2.86823	2.73743	2.65613
PH19	Panda	Heaman and Pearson,2010	64	-110															92.6	0.10776	0.0211	0.10649	2.9		H				3.10704	3.08651	2.94169	2.90933
K11A14	Batty Bay, Somerset Island	Irvine et al., 2003	73.3	-92	75.24	17.14	6.34	1.28		1.1			7.2		44.72			91.716		0.11291	0.0351	0.11285	2.18	2.38	GL	Gnt lherz		Walker, 1989, 187Re/188Os = 0.3972, 187Os/188Os = 0.12757	2.18423	2.38223	2.00813	2.19211
K11A15	Batty Bay, Somerset Island	Irvine et al., 2003	73.3	-92	77.43	14.32	4.19	4.01	0.06	1			7.02		43.47			91.693		0.11431	0.0519	0.11422	1.98	2.26	GSL	Gnt–Sp lherz			1.98426	2.26185	1.80512	2.06023
K11A16	Batty Bay, Somerset Island	Irvine et al., 2003	73.3	-92	74.43	15.06	6.63	3.89		1.3			6.57		43.27			92.1506		0.11227	0.0503	0.11218	2.28	2.59	FL	Gnt lherz			2.28178	2.59064	2.10717	2.39567
K11A17	Batty Bay, Somerset Island	Irvine et al., 2003	73.3	-92	76.73	16.19	3.6	3.37	0.11	0.9			6.93		43.27			91.7559		0.11157	0.0375	0.11151	2.38	2.61	GSL	Gnt–Sp lherz			2.37917	2.61228	2.20604	2.42472
K11A18	Batty Bay, Somerset Island	Irvine et al., 2003	73.3	-92	83.18	12.89	2.45	1.47	0.01	0.8			6.93		45.44			92.1186		0.11493	0.1096	0.11475	1.91	2.58	GSL	Gnt–Sp lherz			1.90672	2.58172	1.7264	2.34561
K12A1	Batty Bay, Somerset Island	Irvine et al., 2003	73.3	-92	76.18	19.01		2.4	2.4	0.9			7.02		44.85			91.9279		0.1146	0.0732	0.11448	1.95	2.36	SL	Sp lherz			1.94624	2.35597	1.76651	2.14262
K13A1	Batty Bay, Somerset Island	Irvine et al., 2003	73.3	-92	67.88	21.86		6.28	3.98	0.9			7.02		38.84			90.7939		0.11113	0.144	0.11089	2.47	3.78	SL	Sp lherz			2.46916	3.77599	2.29738	3.53536
K13A3	Batty Bay, Somerset Island	Irvine et al., 2003	73.3	-92	73.07	24.15		1.9	0.88	0.4			6.75		44.96			92.2318		0.111	0.0314	0.11095	2.46	2.66	SL	Sp lherz			2.46045	2.65918	2.28855	2.47557
K13A4	Batty Bay, Somerset Island	Irvine et al., 2003	73.3	-92	52.6	27.81		13.9	5.63	1.4			7.02		34.41			89.7304		0.11955	0.0875	0.11941	1.22	1.53	SL	Sp lherz			1.22063	1.5346	1.02976	1.29508
K13A5	Batty Bay, Somerset Island	Irvine et al., 2003	73.3	-92	59.19	33.75		3.36	3.7	1.1			6.93		39.5			91.0396		0.11279	0.3004	0.11229	2.27	8.53	SL	Sp lherz			2.26577	8.5291	2.09092	8.1674
K13B4	Batty Bay, Somerset Island	Irvine et al., 2003	73.3	-92	67.25	27.53	4.14	1.09		0.8			6.93		43.96			91.8748		0.1094	0.0182	0.10937	2.69	2.81	GP	Gnt period			2.68919	2.81082	2.52075	2.63608
K15A4	Batty Bay, Somerset Island	Irvine et al., 2003	73.3	-92	73.13	23	3.6	0.27	0.01	0.9			6.84		43.11			91.8265		0.11871	6.2295	0.10836	2.84		GSL	Gnt–Sp lherz			2.83496	-0.0912534	2.66871	-0.0770706
N1C	Nord, Somerset Island	Irvine et al., 2003	73.4	-92.5	77.53	15.67	3.65	2.1	1.05	0.8			7.56		44.32			91.2664		0.11448	0.2957	0.11399	2.02		GSL	Gnt–Sp lherz			2.01788	7.28102	1.83925	6.8667
N2B	Nord, Somerset Island	Irvine et al., 2003	73.4	-92.5	80.83	14.04	2.62	2.5	0.01	0.7			7.29		45.93			91.8239		0.11348	0.114	0.11329	2.12	2.91	GSL	Gnt–Sp lherz			2.12008	2.91445	1.94301	2.68167
XO4	Nikos, Somerset Island	Irvine et al., 2003	73.6	-91	56.49	23.91	12.22	7.38		2.3			7.02		39.9	951	3.36	91.0165	91.8	0.11644	0.3335	0.11589	1.74		GL	Gnt lherz			1.7396	9.66593	1.55672	9.20322
XO5	Nikos, Somerset Island	Irvine et al., 2003	73.6	-91	67.8	19.65	9.65	2.9		1.6			7.47		42.46	1226	5.1	91.0169	92	0.11474	0.575	0.11378	2.05		GL	Gnt lherz			2.04856	-4.49554	1.8704	-3.89052
XO6	Nikos, Somerset Island	Irvine et al., 2003	73.6	-91	64.2	16.39	15.43	0.1	trace	3.1			7.2		39.16	865	2.94	90.6498	91.8	0.11393	0.219	0.11356	2.08	4.43	GSL	Gnt–Sp lherz			2.08068	4.42708	1.90301	4.10383
XO7	Nikos, Somerset Island	Irvine et al., 2003	73.6	-91	69.75	29.38	0.01	0.85	0.01	0.2			6.84		44.8			92.1105		0.10973	0.0534	0.10964	2.65	3.04	GSH	Gnt–Sp harz			2.65017	3.03656	2.48113	2.84758
JP1-X2	JP, Somerset Island	Irvine et al., 2003	73.5	-91	72.06	17.4	5.75	4.41	0.37	1.3			7.29		43.58	884	3.06	91.4208	92.2	0.11339	0.1565	0.11313	2.14	3.44	GSL	Gnt–Sp lherz			2.14341	3.43586	1.9667	3.17404
JP2-X2	JP, Somerset Island	Irvine et al., 2003	73.5	-91	71.93	22.49		3.99	1.6	0.6			6.75		43.22			91.9443		0.1115	0.0342	0.11145	2.39	2.6	SL	Sp lherz			2.38789	2.60012	2.21488	2.41409
JP3-X1	JP, Somerset Island	Irvine et al., 2003	73.5	-91	81.84	15.37		1.55	1.24	0.1			7.29		45.72			91.7894	92.2	0.11135	1.4201	0.10899	2.74		SH	Sp harz			2.74408	-0.95942	2.57646	-0.873659
JP3-X	JP, Somerset Island	Irvine et al., 2003	73.5	-91	76.25	18.56	4.78	0.4		0.8			7.02		44.2	1200	4.89	91.8189		0.11388	0.0857	0.11374	2.06	2.58	GH	Gnt harz			2.0544	2.58165	1.87633	2.36397
JPS-1	JP, Somerset Island	Irvine et al., 2003	73.5	-91	73.11	20.97	1.91	4	0.01	0.6			6.75		43.2	1152	4.57	91.9408	92.4	0.11092	1.3031	0.10875	2.78		GSH	Gnt–Sp harz			2.77872	-1.11348	2.61162	-1.01565
JPS-6A	JP, Somerset Island	Irvine et al., 2003	73.5	-91	74.45	13.46	8.33	3.76		1.4			7.29		43.17	1066	4.03	91.3464	91.7	0.1141	2.8043	0.10945	2.68		GL	Gnt lherz			2.67763	-0.336834	2.50901	-0.301886
JPS-6B	JP, Somerset Island	Irvine et al., 2003	73.5	-91	74.32	10.79	9.42	5.46		1.6			7.29		42.68	1242	5.3	91.2557	92	0.1139	2.406	0.1099	2.61		GL	Gnt lherz			2.61256	-0.409863	2.44296	-0.367779
JPN-2	JP, Somerset Island	Irvine et al., 2003	73.5	-91	78.1	15.73	3.58	1.29	1.31	0.7			8.01		44.59			90.845		0.11086	0.0563	0.11077	2.49	2.87	GSL	Gnt–Sp lherz			2.48656	2.87238	2.31505	2.67889
JPN-3A	JP, Somerset Island	Irvine et al., 2003	73.5	-91	63.67	29.26	5.81	1.26		1.1			6.84		42.74	1262	5.8	91.7616	92.3	0.11274	0.0564	0.11265	2.21	2.56	GH	Gnt harz			2.21336	2.55673	2.03771	2.35762
JPN-3B	JP, Somerset Island	Irvine et al., 2003	73.5	-91	63.78	27.01	5.62	3.6		1.1			6.75		42.13			91.753		0.11445	0.1319	0.11423	1.98	2.9	GP	Gnt perid			1.9828	2.89733	1.80364	2.64813
JPN-4	JP, Somerset Island	Irvine et al., 2003	73.5	-91	66.02	23.23	9.17	1.57		1.7			7.02		42.84			91.5811		0.11593	0.0439	0.11586	1.74	1.95	GL	Gnt lherz			1.74401	1.9457	1.56119	1.74329
JPN-9	JP, Somerset Island	Irvine et al., 2003	73.5	-91	75.1	18.47	4.58	1.84		0.7			7.38		44.44	850	2.88	91.4777	92.2	0.11256	0.104	0.11238	2.25	3	GL	Gnt lherz			2.25268	2.99678	2.07762	2.77377
JPN-11	JP, Somerset Island	Irvine et al., 2003	73.5	-91	63.33	30.49	3.98	2.21		0.7			7.11		43.05	1190	4.56	91.5204	92.3	0.11487	0.0572	0.11477	1.9	2.2	GL	Gnt lherz			1.9038	2.20121	1.72343	1.99532
HK1-13H	Homestead, Wyoming	Carlson et al., 2004	47	-109						0.35		3.3		3.54	43.28			92.2191		0.11037	0.112		2.61	3.47	SH	Sp Hz		Miesel et al., 2001, 187Re/188Os = 0.43464, 187Os/188Os =0.1296	2.59475	3.4681	2.37389	3.29646
HK1-13W	Homestead, Wyoming	Carlson et al., 2004	47	-109						1.12		2.75		2.6	35.56	1172		92.5879		0.11291	0.4214		2.3	47.37	SW	Sp Web			2.25838	47.346	1.99926	-36.7946
HK1-19	Homestead, Wyoming	Carlson et al., 2004	47	-109						1.33		3.06		3.6	39.52	1136	3.42	91.7273		0.11022	0.0473		2.62	2.93	GH	Ga Hz			2.61455	2.92563	2.39594	2.71701
HK1-21	Homestead, Wyoming	Carlson et al., 2004	47	-109						0.15		4.23		3.46	42.92			91.3263		0.11193	1.298		2.53	-1.24	D	Dunite			2.38838	-1.24219	2.14408	-0.95336
HK1-24	Homestead, Wyoming	Carlson et al., 2004	47	-109						1.98		3.95		3.71	37.72	1211	2.45	90.2496		0.1182	0.0991		1.56	2	GL	Ga Lhz			1.55173	2.00157	1.21142	1.61527
HK1-25	Homestead, Wyoming	Carlson et al., 2004	47	-109						1.84		3.13		4.32	40	1213	3.79	90.9019			0.1761				GL	Ga Lhz				24.3376		27.5874
HK1-26	Homestead, Wyoming	Carlson et al., 2004	47	-109						1.29		3.3		3.44	40.16	1090	4.21	91.7825		0.11173	0.0704		2.42	2.87	GL	Ga Lhz			2.41488	2.8698	2.17359	2.6385
HK4-1	Homestead, Wyoming	Carlson et al., 2004	47	-109						2.7		2.75		3.99	40.3	1127	3.74	91.7441		0.11	0.0562		2.65	3.03	GL	Ga Lhz			2.64359	3.02576	2.42827	2.82477
HOO10-22	Homestead, Wyoming	Carlson et al., 2004	47	-109						1.26		2.53		3.39	42.48	1124	3.41	93.0377							GH	Ga Hz
13-16-3	Sloan, Wyoming	Carlson et al., 2004	41	-104						0.33		3.36		3.48	43	1255	5.13	92.179		0.11617	0.0884		1.9	2.28	GH	Ga Hz			1.82388	2.27994	1.51497	1.94843
13-19-2	Sloan, Wyoming	Carlson et al., 2004	41	-104						3.19		3.46		3.39	20.8	711		85.0773		7.379	6.073			49.63	GW	Ga Web			#NUM!	49.6249	#NUM!	49.3851
13-19-6	Sloan, Wyoming	Carlson et al., 2004	41	-104						1.14		4.34		4.01	41.55	758		90.345		0.2219	2.277		2.45	4.54	SH	Sp Hz			-14.304	2.93525	-16.7803	2.97315
13-19-11	Sloan, Wyoming	Carlson et al., 2004	41	-104						0.77		2.76		4.59	42.4	1249	5.05	91.442		0.12472	0.0859		0.74	0.83	GH	Ga Hz			0.669165	0.832543	0.225964	0.289141
13-19-15	Sloan, Wyoming	Carlson et al., 2004	41	-104						3.96		3.43		4.78	35.7	757	2.49	88.9986		0.12664	0.5805		0.91	-1.24	GH	Ga Hz			0.406776	-1.23627	-0.067343	0.140243
13-19-20	Sloan, Wyoming	Carlson et al., 2004	41	-104						2.71		3.41		4.77	37.78	815	2.19	89.5743		0.12441					GSL	Sp-Ga Lhz			0.711422		0.273187
13-19-22	Sloan, Wyoming	Carlson et al., 2004	41	-104						0.95		4.15		3.99	40.76	1328	6.01	90.3905		0.11939	0.2108		1.57	2.67	GL	Ga Lhz			1.39161	2.66957	1.03277	2.20972
13-19-27	Sloan, Wyoming	Carlson et al., 2004	41	-104						3.3		4.32		3.86	35.78	777	2.27	89.1688		0.12758	0.992		1.14	-0.22	GL	Ga Lhz			0.277896	-0.218195	-0.211466	0.137989
